# Supplementary material
Source: PubMed Central journal article supplement (PMC3567869)

### **Supplementary Figure 1**

**HEK293T cell lines stably expressing FLAG Numb were generated:** (A) Immunoblot showing varied expression level in different clones of HEK293T cell lines stably expressing amino or carboxy terminal 3XFLAG-Numb p66 or p72. (B) Anti-FLAG immunoaffinity purified protein complexes from HEK293T cells stably expressing either p66, p72, or empty vector were separated by SDS-PAGE gel and then stained by Colloidal blue. Arrows indicate expression of FLAG-Numb p66 or p72. Bands from all three lanes were cut and digested in-gel prior to LC-MS/MS analysis.

### **Supplementary Figure 2:**

**SRM can be used to monitor endogenous Numb complexes in medulloblastoma cell lines:**

(A) Immunoblot showing endogenous levels of Numb in medulloblastoma cell lines Daoy, MED8A, ONS76, and HEK293T cells. (B) Indicated cell lines were lysed and a Numb antibody used to immunopurify endogenous Numb complexes. Proteins were trypsin digested and analyzed by SRM-MS. Average SRM signal relatively quantifying total Numb in each cell line is shown. Error bars represent standard error of the mean. Graphs are representation of three technical runs of three biological replicate experiments. (C) Numb associated complexes in indicated cancer cell lines were monitored by SRM. SRM signal was normalized to Numb level within each experiment, and plotted on the appropriate scale. Error bars represent standard error of the mean.

### **Supplementary Figure 3:**

**Eps15 and Numb isoforms are similarly recruited to clathrin coated vesicles:**

PLA was performed using antibodies against (A) Flag (Numb) and Transferrin Receptor (TfR) or (B) Eps15 and TfR. Images are representative examples of images taken, PLA events were

quantified and illustrated in Figure 7. There was no significant difference found between the number of PLA events with either of the conditions or Numb isoforms tested (Figure 7D).

**Supplementary Table 1: LC-MS/MS Analysis of Numb:** Complete list of identified proteins from proteins identified by LC-MS/MS as co-immunoprecipitating with either 3XFLAG-Nbp66 3XFLAG-Nbp72 (amino and carboxy tags), for empty FLAG vector.

**Supplementary Table 2:**

**SRM transitions were developed and optimized to monitor Numb and Numb interacting proteins:** A summary table of the transitions designed and used for SRM analysis of Numb interacting proteins. hNb and hNbL transitions were only used for endogenous SRM analysis.

Raw data generated has been uploaded to Tranche Repository, and can be downloaded at [www.tinyurl.com/kriegeretal](http://www.tinyurl.com/kriegeretal)

Supplementary Table 1

| Identified Proteins                                                   | Accession Number | Molecular Weight | p66            |                   |                 | p72            |                   |                 | pFlag          |                   |                 |
|-----------------------------------------------------------------------|------------------|------------------|----------------|-------------------|-----------------|----------------|-------------------|-----------------|----------------|-------------------|-----------------|
|                                                                       |                  |                  | Spectral Count | Sequence Coverage | Unique Peptides | Spectral Count | Sequence Coverage | Unique Peptides | Spectral Count | Sequence Coverage | Unique Peptides |
| Keratin, type II cytoskeletal 1                                       | IPI00220327      | 66 kDa           | 1326           | 45%               | 37              | 1673           | 37%               | 31              | 115            | 20%               | 15              |
| Isoform 1 of Protein numb homolog                                     | IPI00137943      | 71 kDa           | 253            | 32%               | 21              | 1060           | 41%               | 26              | 0              | 0%                | 0               |
| Keratin, type I cytoskeletal 10                                       | IPI00009865      | 60 kDa           | 572            | 37%               | 26              | 570            | 32%               | 22              | 53             | 17%               | 12              |
| Keratin, type I cytoskeletal 9                                        | IPI00019359      | 62 kDa           | 422            | 50%               | 20              | 603            | 43%               | 23              | 29             | 8%                | 3               |
| Keratin, type II cytoskeletal 2 epidermal                             | IPI00021304      | 66 kDa           | 443            | 41%               | 26              | 497            | 33%               | 24              | 23             | 13%               | 12              |
| Adaptor-related protein complex 2, alpha 2 subunit variant (Fragment) | IPI00016621      | 104 kDa          | 187            | 34%               | 36              | 671            | 36%               | 41              | 0              | 0%                | 0               |
| Isoform 1 of AP-2 complex subunit beta-1                              | IPI00784156      | 105 kDa          | 178            | 35%               | 32              | 643            | 38%               | 40              | 0              | 0%                | 0               |
| Kappa light chain variable region (Fragment)                          | IPI00743194      | 13 kDa           | 299            | 17%               | 2               | 488            | 17%               | 2               | 100            | 17%               | 2               |
| Isoform 1 of Nucleophosmin                                            | IPI00549248      | 33 kDa           | 132            | 60%               | 19              | 360            | 42%               | 10              | 21             | 43%               | 9               |
| Isoform 1 of AP-2 complex subunit mu-1                                | IPI00022256      | 50 kDa           | 107            | 36%               | 17              | 375            | 55%               | 23              | 0              | 0%                | 0               |
| Anti-colorectal carcinoma heavy chain                                 | IPI00470657      | 51 kDa           | 227            | 17%               | 8               | 276            | 22%               | 10              | 57             | 17%               | 8               |
| Isoform B of AP-2 complex subunit alpha-1                             | IPI00256684      | 105 kDa          | 127            | 21%               | 22              | 359            | 25%               | 25              | 0              | 0%                | 0               |
| Heat shock 70 kDa protein 1                                           | IPI00304925      | 70 kDa           | 107            | 25%               | 20              | 321            | 35%               | 22              | 57             | 29%               | 20              |
| Nucleolin                                                             | IPI00604620      | 77 kDa           | 58             | 22%               | 24              | 279            | 35%               | 26              | 14             | 17%               | 9               |
| Epidermal growth factor receptor substrate 15                         | IPI00292134      | 99 kDa           | 38             | 24%               | 17              | 294            | 41%               | 39              | 0              | 0%                | 0               |
| Histone H1.2                                                          | IPI00217465      | 21 kDa           | 183            | 44%               | 15              | 130            | 34%               | 12              | 22             | 27%               | 9               |
| Actin, cytoplasmic 2                                                  | IPI00021440      | 42 kDa           | 63             | 40%               | 14              | 60             | 32%               | 12              | 178            | 45%               | 16              |
| Non-POU domain-containing octamer-binding protein                     | IPI00304596      | 54 kDa           | 62             | 34%               | 14              | 204            | 54%               | 22              | 0              | 0%                | 0               |
| Isoform Long of Splicing factor, proline- and glutamine-rich          | IPI00010740      | 76 kDa           | 7              | 12%               | 7               | 201            | 33%               | 20              | 71             | 15%               | 9               |
| Isoform 1 of Heterogeneous nuclear ribonucleoprotein M                | IPI00171903      | 78 kDa           | 40             | 23%               | 17              | 219            | 45%               | 28              | 2              | 4%                | 2               |

|                                                                                       |             |         |     |     |    |     |     |    |     |     |    |
|---------------------------------------------------------------------------------------|-------------|---------|-----|-----|----|-----|-----|----|-----|-----|----|
| HSPA5 protein                                                                         | IPI00003362 | 72 kDa  | 23  | 14% | 9  | 257 | 45% | 31 | 0   | 0%  | 0  |
| RALBP1 associated Eps domain containing 1 isoform a                                   | IPI00337532 | 87 kDa  | 75  | 18% | 25 | 151 | 31% | 27 | 0   | 0%  | 0  |
| 60S ribosomal protein L7a                                                             | IPI00299573 | 30 kDa  | 115 | 30% | 10 | 83  | 30% | 10 | 3   | 8%  | 2  |
| Tubulin beta chain                                                                    | IPI00011654 | 50 kDa  | 69  | 31% | 15 | 98  | 31% | 16 | 44  | 31% | 14 |
| 60S ribosomal protein L4                                                              | IPI00003918 | 48 kDa  | 89  | 32% | 16 | 92  | 27% | 11 | 7   | 6%  | 2  |
| cDNA FLJ61399, highly similar to Spectrin alpha chain, brain                          | IPI00744706 | 282 kDa | 15  | 8%  | 15 | 4   | 2%  | 4  | 127 | 32% | 57 |
| 40S ribosomal protein S3                                                              | IPI00011253 | 27 kDa  | 55  | 34% | 8  | 74  | 69% | 14 | 0   | 0%  | 0  |
| Isoform 1 of Heat shock cognate 71 kDa protein                                        | IPI00003865 | 71 kDa  | 55  | 20% | 16 | 111 | 34% | 19 | 15  | 17% | 8  |
| Isoform A1-B of Heterogeneous nuclear ribonucleoprotein A1                            | IPI00215965 | 39 kDa  | 44  | 23% | 8  | 114 | 44% | 14 | 0   | 0%  | 0  |
| Serine/threonine-protein kinase 38                                                    | IPI00027251 | 54 kDa  | 50  | 34% | 13 | 69  | 27% | 14 | 19  | 23% | 11 |
| Insulin-like growth factor 2 mRNA-binding protein 1                                   | IPI00008557 | 63 kDa  | 24  | 15% | 8  | 124 | 28% | 13 | 7   | 8%  | 5  |
| cDNA FLJ60624, highly similar to Epidermal growth factor receptor substrate 15-like 1 | IPI00163849 | 100 kDa | 7   | 7%  | 6  | 124 | 23% | 30 | 0   | 0%  | 0  |
| 60S acidic ribosomal protein P0                                                       | IPI00008530 | 34 kDa  | 47  | 33% | 10 | 96  | 56% | 16 | 0   | 0%  | 0  |
| 60S ribosomal protein L3                                                              | IPI00550021 | 46 kDa  | 36  | 15% | 9  | 70  | 31% | 14 | 0   | 0%  | 0  |
| Tubulin alpha-1C chain                                                                | IPI00218343 | 50 kDa  | 44  | 20% | 10 | 72  | 22% | 7  | 21  | 21% | 9  |
| 60S ribosomal protein L7                                                              | IPI00030179 | 29 kDa  | 53  | 25% | 10 | 52  | 25% | 10 | 0   | 0%  | 0  |
| 60S ribosomal protein L6                                                              | IPI00329389 | 33 kDa  | 29  | 24% | 11 | 81  | 36% | 14 | 3   | 10% | 3  |
| heterogeneous nuclear ribonucleoprotein U isoform a                                   | IPI00644079 | 91 kDa  | 37  | 11% | 14 | 79  | 18% | 11 | 0   | 0%  | 0  |
| 60S ribosomal protein L10a                                                            | IPI00412579 | 25 kDa  | 30  | 18% | 6  | 69  | 32% | 9  | 0   | 0%  | 0  |
| 60S ribosomal protein L5                                                              | IPI00000494 | 34 kDa  | 49  | 24% | 12 | 66  | 31% | 11 | 6   | 13% | 3  |
| Keratin, type I cytoskeletal 16                                                       | IPI00217963 | 51 kDa  | 92  | 22% | 11 | 30  | 8%  | 7  | 0   | 0%  | 0  |
| Keratin, type II cytoskeletal 5                                                       | IPI00009867 | 62 kDa  | 67  | 15% | 13 | 44  | 7%  | 6  | 0   | 0%  | 0  |

|                                                              |             |         |    |     |    |    |     |    |    |     |    |
|--------------------------------------------------------------|-------------|---------|----|-----|----|----|-----|----|----|-----|----|
| Keratin, type II cytoskeletal 6A                             | IPI00300725 | 60 kDa  | 77 | 23% | 14 | 38 | 10% | 11 | 0  | 0%  | 0  |
| 60S acidic ribosomal protein P2                              | IPI00008529 | 12 kDa  | 71 | 85% | 9  | 62 | 84% | 8  | 9  | 49% | 4  |
| Isoform 2 of Heterogeneous nuclear ribonucleoprotein K       | IPI00216746 | 51 kDa  | 26 | 24% | 8  | 94 | 44% | 17 | 0  | 0%  | 0  |
| Trypsin-1                                                    | IPI00011694 | 27 kDa  | 48 | 7%  | 2  | 0  | 0%  | 0  | 0  | 0%  | 0  |
| 40S ribosomal protein S19                                    | IPI00215780 | 16 kDa  | 35 | 34% | 11 | 57 | 51% | 11 | 7  | 20% | 5  |
| similar to 23 kD highly basic protein                        | IPI00398964 | 24 kDa  | 25 | 34% | 8  | 43 | 31% | 7  | 6  | 17% | 3  |
| Isoform Long of Spectrin beta chain, brain 1                 | IPI00005614 | 275 kDa | 7  | 5%  | 7  | 0  | 0%  | 0  | 83 | 23% | 40 |
| Isoform 1 of 60S ribosomal protein L11                       | IPI00376798 | 20 kDa  | 53 | 24% | 5  | 54 | 24% | 4  | 4  | 12% | 2  |
| Isoform 1 of Nucleolar RNA helicase 2                        | IPI00015953 | 87 kDa  | 9  | 6%  | 6  | 86 | 31% | 19 | 0  | 0%  | 0  |
| 60S ribosomal protein L8                                     | IPI00012772 | 28 kDa  | 43 | 16% | 4  | 43 | 24% | 4  | 5  | 11% | 2  |
| Hornerin                                                     | IPI00398625 | 282 kDa | 33 | 3%  | 8  | 51 | 3%  | 7  | 0  | 0%  | 0  |
| 40S ribosomal protein S4, X isoform                          | IPI00217030 | 30 kDa  | 52 | 29% | 9  | 36 | 20% | 9  | 2  | 4%  | 2  |
| 60S ribosomal protein L23a                                   | IPI00021266 | 18 kDa  | 34 | 33% | 7  | 50 | 50% | 9  | 2  | 13% | 2  |
| 40S ribosomal protein S9                                     | IPI00221088 | 23 kDa  | 31 | 24% | 7  | 52 | 33% | 9  | 0  | 0%  | 0  |
| 25 kDa protein                                               | IPI00872430 | 25 kDa  | 30 | 28% | 7  | 79 | 37% | 8  | 0  | 0%  | 0  |
| Kinesin-like protein KIF11                                   | IPI00305289 | 119 kDa | 30 | 13% | 15 | 41 | 16% | 14 | 13 | 10% | 8  |
| ATP-dependent RNA helicase A                                 | IPI00844578 | 141 kDa | 9  | 5%  | 7  | 79 | 28% | 28 | 4  | 2%  | 2  |
| 40S ribosomal protein S18                                    | IPI00013296 | 18 kDa  | 34 | 32% | 8  | 40 | 43% | 7  | 6  | 19% | 5  |
| Protein arginine N-methyltransferase 5                       | IPI00441473 | 73 kDa  | 31 | 16% | 12 | 44 | 15% | 8  | 15 | 6%  | 6  |
| Isoform B1 of Heterogeneous nuclear ribonucleoproteins A2/B1 | IPI00396378 | 37 kDa  | 23 | 20% | 7  | 68 | 35% | 10 | 3  | 8%  | 2  |
| Trifunctional enzyme subunit beta, mitochondrial             | IPI00022793 | 51 kDa  | 5  | 7%  | 4  | 29 | 12% | 7  | 47 | 34% | 15 |
| Isoform 1 of Protein VPRBP                                   | IPI00329528 | 169 kDa | 24 | 12% | 17 | 52 | 13% | 20 | 0  | 0%  | 0  |
| Heterogeneous nuclear ribonucleoprotein H                    | IPI00013881 | 49 kDa  | 27 | 11% | 4  | 74 | 30% | 9  | 4  | 11% | 4  |

|                                                   |             |         |    |     |    |    |     |    |    |     |    |
|---------------------------------------------------|-------------|---------|----|-----|----|----|-----|----|----|-----|----|
| 60S ribosomal protein L9                          | IPI00031691 | 22 kDa  | 21 | 16% | 3  | 61 | 23% | 5  | 3  | 6%  | 2  |
| Isoform 1 of Clathrin heavy chain 1               | IPI00024067 | 192 kDa | 44 | 16% | 23 | 44 | 12% | 20 | 0  | 0%  | 0  |
| 60S ribosomal protein L15                         | IPI00470528 | 24 kDa  | 15 | 19% | 4  | 35 | 31% | 8  | 3  | 8%  | 2  |
| Heat shock protein HSP 90-beta                    | IPI00414676 | 83 kDa  | 37 | 15% | 15 | 48 | 15% | 16 | 15 | 13% | 9  |
| Isoform 1 of Polyadenylate-binding protein 1      | IPI00008524 | 71 kDa  | 29 | 16% | 10 | 61 | 31% | 18 | 0  | 0%  | 0  |
| Isoform 2 of AP-2 complex subunit sigma-1         | IPI00183781 | 12 kDa  | 0  | 0%  | 0  | 87 | 44% | 5  | 0  | 0%  | 0  |
| Isoform 1 of 60S ribosomal protein L12            | IPI00024933 | 18 kDa  | 28 | 39% | 5  | 44 | 48% | 6  | 0  | 0%  | 0  |
| Isoform A of AP-1 complex subunit beta-1          | IPI00328257 | 105 kDa | 16 | 10% | 6  | 77 | 17% | 17 | 0  | 0%  | 0  |
| RalA-binding protein 1                            | IPI00009544 | 76 kDa  | 9  | 9%  | 5  | 70 | 27% | 20 | 0  | 0%  | 0  |
| Trifunctional enzyme subunit alpha, mitochondrial | IPI00031522 | 83 kDa  | 7  | 5%  | 5  | 74 | 22% | 19 | 0  | 0%  | 0  |
| 60S ribosomal protein L13                         | IPI00465361 | 24 kDa  | 44 | 42% | 12 | 21 | 25% | 7  | 3  | 11% | 2  |
| Probable ATP-dependent RNA helicase DDX5          | IPI00017617 | 69 kDa  | 12 | 4%  | 3  | 53 | 15% | 11 | 0  | 0%  | 0  |
| ribosomal protein L17-like                        | IPI00478208 | 21 kDa  | 28 | 23% | 6  | 62 | 34% | 8  | 0  | 0%  | 0  |
| Elongation factor 1-alpha 1                       | IPI00396485 | 50 kDa  | 25 | 13% | 9  | 31 | 20% | 9  | 20 | 17% | 7  |
| 60S ribosomal protein L21                         | IPI00247583 | 19 kDa  | 33 | 28% | 3  | 49 | 32% | 4  | 0  | 0%  | 0  |
| 60S ribosomal protein L19                         | IPI00025329 | 23 kDa  | 20 | 19% | 6  | 42 | 19% | 6  | 2  | 10% | 2  |
| 60S ribosomal protein L18                         | IPI00215719 | 22 kDa  | 37 | 31% | 7  | 53 | 34% | 6  | 0  | 0%  | 0  |
| Ribosomal L1 domain-containing protein 1          | IPI00008708 | 55 kDa  | 16 | 16% | 8  | 51 | 34% | 16 | 0  | 0%  | 0  |
| Isoform 1 of Angiomotin                           | IPI00163085 | 118 kDa | 0  | 0%  | 0  | 2  | 2%  | 2  | 64 | 21% | 19 |
| Isoform 1 of Myb-binding protein 1A               | IPI00005024 | 149 kDa | 11 | 6%  | 8  | 63 | 17% | 21 | 0  | 0%  | 0  |
| Ras GTPase-activating protein-binding protein 1   | IPI00012442 | 52 kDa  | 26 | 31% | 10 | 40 | 29% | 10 | 0  | 0%  | 0  |
| 40S ribosomal protein S3a                         | IPI00419880 | 30 kDa  | 29 | 24% | 7  | 36 | 38% | 10 | 3  | 8%  | 2  |
| 40S ribosomal protein S6                          | IPI00021840 | 29 kDa  | 31 | 27% | 9  | 43 | 33% | 11 | 0  | 0%  | 0  |

|                                                                    |             |         |    |     |    |    |     |    |    |     |    |
|--------------------------------------------------------------------|-------------|---------|----|-----|----|----|-----|----|----|-----|----|
| 60S ribosomal protein L10                                          | IPI00554723 | 25 kDa  | 33 | 21% | 5  | 47 | 26% | 6  | 0  | 0%  | 0  |
| 40S ribosomal protein S2                                           | IPI00013485 | 31 kDa  | 27 | 26% | 8  | 39 | 34% | 8  | 0  | 0%  | 0  |
| Isoform 1 of Serine/arginine repetitive matrix protein 2           | IPI00782992 | 300 kDa | 37 | 8%  | 16 | 34 | 4%  | 12 | 0  | 0%  | 0  |
| Isoform Short of RNA-binding protein FUS                           | IPI00221354 | 53 kDa  | 8  | 7%  | 5  | 55 | 13% | 6  | 0  | 0%  | 0  |
| Isoform 5 of Interleukin enhancer-binding factor 3                 | IPI00219330 | 75 kDa  | 14 | 10% | 10 | 48 | 32% | 18 | 0  | 0%  | 0  |
| Isoform 1 of Plasminogen activator inhibitor 1 RNA-binding protein | IPI00410693 | 45 kDa  | 14 | 16% | 6  | 55 | 38% | 12 | 2  | 7%  | 2  |
| Isoform 1 of Polypyrimidine tract-binding protein 1                | IPI00179964 | 57 kDa  | 9  | 10% | 7  | 57 | 32% | 9  | 0  | 0%  | 0  |
| Dermeidin                                                          | IPI00027547 | 11 kDa  | 21 | 34% | 4  | 23 | 24% | 3  | 0  | 0%  | 0  |
| 40S ribosomal protein S25                                          | IPI00012750 | 14 kDa  | 19 | 24% | 5  | 30 | 38% | 6  | 0  | 0%  | 0  |
| Interleukin enhancer-binding factor 2                              | IPI00005198 | 43 kDa  | 22 | 21% | 6  | 49 | 28% | 10 | 0  | 0%  | 0  |
| Uncharacterized protein ALB                                        | IPI00022434 | 72 kDa  | 47 | 6%  | 5  | 10 | 2%  | 2  | 0  | 0%  | 0  |
| Nuclease-sensitive element-binding protein 1                       | IPI00031812 | 36 kDa  | 18 | 27% | 8  | 46 | 40% | 9  | 9  | 18% | 5  |
| 40S ribosomal protein S13                                          | IPI00221089 | 17 kDa  | 27 | 28% | 6  | 34 | 39% | 6  | 0  | 0%  | 0  |
| Isoform 2 of Filamin-A                                             | IPI00302592 | 280 kDa | 19 | 10% | 18 | 25 | 9%  | 18 | 13 | 6%  | 10 |
| Keratin, type I cytoskeletal 14                                    | IPI00384444 | 52 kDa  | 41 | 13% | 4  | 28 | 6%  | 2  | 0  | 0%  | 0  |
| 40S ribosomal protein S10                                          | IPI00008438 | 19 kDa  | 22 | 25% | 7  | 35 | 29% | 6  | 3  | 15% | 2  |
| RPL14 protein                                                      | IPI00555744 | 24 kDa  | 19 | 22% | 5  | 47 | 32% | 6  | 0  | 0%  | 0  |
| 33 kDa protein                                                     | IPI00413108 | 33 kDa  | 15 | 15% | 3  | 44 | 29% | 8  | 8  | 19% | 4  |
| Histone H1x                                                        | IPI00021924 | 22 kDa  | 22 | 36% | 6  | 40 | 31% | 5  | 0  | 0%  | 0  |
| DEAD box polypeptide 17 isoform 1                                  | IPI00023785 | 80 kDa  | 6  | 6%  | 4  | 48 | 20% | 11 | 2  | 4%  | 2  |
| 40S ribosomal protein S14                                          | IPI00026271 | 16 kDa  | 23 | 30% | 5  | 36 | 34% | 6  | 5  | 19% | 3  |
| 60S ribosomal protein L24                                          | IPI00306332 | 18 kDa  | 18 | 14% | 3  | 29 | 19% | 4  | 0  | 0%  | 0  |
| Isoform ASF-1 of Splicing factor, arginine/serine-rich 1           | IPI00215884 | 28 kDa  | 22 | 28% | 6  | 32 | 40% | 10 | 0  | 0%  | 0  |

|                                                                              |             |         |    |     |   |    |     |    |    |     |   |
|------------------------------------------------------------------------------|-------------|---------|----|-----|---|----|-----|----|----|-----|---|
| Poly [ADP-ribose] polymerase 1                                               | IPI00449049 | 113 kDa | 12 | 8%  | 7 | 40 | 17% | 14 | 0  | 0%  | 0 |
| Isoform 2 of Heterogeneous nuclear ribonucleoprotein D0                      | IPI00220683 | 36 kDa  | 13 | 13% | 5 | 41 | 29% | 9  | 0  | 0%  | 0 |
| 40S ribosomal protein S7                                                     | IPI00013415 | 22 kDa  | 18 | 11% | 3 | 27 | 32% | 6  | 3  | 23% | 2 |
| DNA damage-binding protein 1                                                 | IPI00293464 | 127 kDa | 9  | 5%  | 7 | 28 | 11% | 14 | 0  | 0%  | 0 |
| Isoform 1 of BMP-2-inducible protein kinase                                  | IPI00337426 | 129 kDa | 22 | 6%  | 8 | 40 | 12% | 14 | 0  | 0%  | 0 |
| 40S ribosomal protein S16                                                    | IPI00221092 | 16 kDa  | 14 | 14% | 3 | 28 | 50% | 7  | 0  | 0%  | 0 |
| 60S ribosomal protein L26                                                    | IPI00027270 | 17 kDa  | 11 | 21% | 7 | 20 | 31% | 7  | 0  | 0%  | 0 |
| 52 kDa Ro protein                                                            | IPI00018971 | 54 kDa  | 10 | 13% | 5 | 20 | 14% | 8  | 6  | 11% | 3 |
| 60S ribosomal protein L35                                                    | IPI00412607 | 15 kDa  | 15 | 22% | 3 | 29 | 26% | 4  | 0  | 0%  | 0 |
| 60S ribosomal protein L27                                                    | IPI00219155 | 16 kDa  | 17 | 30% | 3 | 19 | 30% | 3  | 0  | 0%  | 0 |
| Isoform Beta of Nucleolar phosphoprotein p130                                | IPI00216654 | 75 kDa  | 15 | 9%  | 7 | 30 | 14% | 10 | 0  | 0%  | 0 |
| 60S ribosomal protein L28                                                    | IPI00182533 | 16 kDa  | 25 | 23% | 7 | 20 | 25% | 6  | 2  | 16% | 2 |
| Isoform 1 of Insulin-like growth factor 2 mRNA-binding protein 3             | IPI00658000 | 64 kDa  | 3  | 4%  | 3 | 42 | 23% | 10 | 0  | 0%  | 0 |
| ATP-dependent RNA helicase DDX3X                                             | IPI00215637 | 73 kDa  | 6  | 7%  | 4 | 40 | 20% | 13 | 0  | 0%  | 0 |
| 14-3-3 protein epsilon                                                       | IPI00000816 | 29 kDa  | 13 | 22% | 7 | 31 | 28% | 11 | 0  | 0%  | 0 |
| cDNA FLJ54492, highly similar to Eukaryotic translation initiation factor 4B | IPI00012079 | 70 kDa  | 18 | 17% | 7 | 15 | 10% | 5  | 14 | 18% | 7 |
| 40S ribosomal protein S23                                                    | IPI00218606 | 16 kDa  | 19 | 16% | 3 | 20 | 24% | 4  | 0  | 0%  | 0 |
| Splicing factor, arginine/serine-rich 3                                      | IPI00010204 | 19 kDa  | 13 | 19% | 4 | 28 | 29% | 5  | 0  | 0%  | 0 |
| ATP-dependent RNA helicase DDX18                                             | IPI00301323 | 75 kDa  | 4  | 6%  | 3 | 40 | 24% | 14 | 0  | 0%  | 0 |
| 40S ribosomal protein S17                                                    | IPI00221093 | 16 kDa  | 15 | 30% | 4 | 29 | 53% | 6  | 0  | 0%  | 0 |
| Isoform 1 of 40S ribosomal protein S24                                       | IPI00029750 | 15 kDa  | 10 | 29% | 3 | 37 | 35% | 5  | 0  | 0%  | 0 |
| hypothetical protein LOC389435                                               | IPI00398135 | 17 kDa  | 21 | 16% | 3 | 23 | 22% | 4  | 3  | 16% | 2 |



|                                                                                   |             |         |    |     |   |    |     |    |    |     |   |
|-----------------------------------------------------------------------------------|-------------|---------|----|-----|---|----|-----|----|----|-----|---|
| Probable ATP-dependent RNA helicase DDX6                                          | IPI00030320 | 54 kDa  | 11 | 18% | 6 | 32 | 41% | 12 | 0  | 0%  | 0 |
| NOL1 protein                                                                      | IPI00654555 | 93 kDa  | 10 | 13% | 9 | 24 | 19% | 13 | 0  | 0%  | 0 |
| 60S ribosomal protein L31                                                         | IPI00026302 | 14 kDa  | 17 | 36% | 5 | 19 | 26% | 3  | 0  | 0%  | 0 |
| 60 kDa heat shock protein, mitochondrial                                          | IPI00784154 | 61 kDa  | 11 | 9%  | 7 | 9  | 17% | 8  | 10 | 17% | 4 |
| Proliferation-associated protein 2G4                                              | IPI00299000 | 44 kDa  | 6  | 15% | 6 | 21 | 36% | 12 | 0  | 0%  | 0 |
| Isoform 2 of Guanine nucleotide-binding protein-like 3                            | IPI00003886 | 61 kDa  | 8  | 10% | 5 | 17 | 15% | 5  | 0  | 0%  | 0 |
| cDNA FLJ78093, highly similar to Homo sapiens ribosomal protein L29 (RPL29), mRNA | IPI00796934 | 18 kDa  | 17 | 16% | 2 | 0  | 0%  | 0  | 0  | 0%  | 0 |
| Isoform 1 of Heterogeneous nuclear ribonucleoprotein Q                            | IPI00018140 | 70 kDa  | 9  | 6%  | 5 | 17 | 11% | 7  | 0  | 0%  | 0 |
| Ribosomal protein 26 (RPS26) pseudogene                                           | IPI00186712 | 13 kDa  | 14 | 21% | 2 | 21 | 21% | 3  | 0  | 0%  | 0 |
| Isoform 3 of Heterogeneous nuclear ribonucleoprotein A/B                          | IPI00334713 | 31 kDa  | 10 | 20% | 5 | 25 | 26% | 7  | 0  | 0%  | 0 |
| Isoform 1 of Ribosomal RNA processing protein 1 homolog B                         | IPI00290952 | 84 kDa  | 4  | 3%  | 2 | 29 | 21% | 13 | 0  | 0%  | 0 |
| 60S acidic ribosomal protein P1                                                   | IPI00008527 | 12 kDa  | 15 | 33% | 2 | 0  | 0%  | 0  | 0  | 0%  | 0 |
| Uncharacterized protein ENSP00000374804                                           | IPI00829827 | 13 kDa  | 8  | 13% | 2 | 0  | 0%  | 0  | 0  | 0%  | 0 |
| Isoform 1 of Fragile X mental retardation syndrome-related protein 1              | IPI00016249 | 70 kDa  | 6  | 7%  | 3 | 32 | 12% | 13 | 0  | 0%  | 0 |
| Nucleolar protein 5A                                                              | IPI00411937 | 66 kDa  | 2  | 4%  | 2 | 29 | 39% | 16 | 0  | 0%  | 0 |
| 40S ribosomal protein S5                                                          | IPI00008433 | 23 kDa  | 13 | 13% | 4 | 15 | 31% | 6  | 0  | 0%  | 0 |
| 60S ribosomal protein L23                                                         | IPI00010153 | 15 kDa  | 16 | 27% | 4 | 19 | 27% | 3  | 0  | 0%  | 0 |
| Beta-actin-like protein 2                                                         | IPI00003269 | 42 kDa  | 0  | 0%  | 0 | 0  | 0%  | 0  | 17 | 20% | 4 |
| DNA topoisomerase 1                                                               | IPI00413611 | 91 kDa  | 0  | 0%  | 0 | 27 | 19% | 13 | 0  | 0%  | 0 |
| Thyroid hormone receptor-associated protein 3                                     | IPI00104050 | 109 kDa | 14 | 9%  | 9 | 18 | 6%  | 8  | 3  | 5%  | 3 |
| Lung cancer oncogene 7                                                            | IPI00641950 | 38 kDa  | 15 | 14% | 5 | 17 | 17% | 5  | 0  | 0%  | 0 |
| Protein RRP5 homolog                                                              | IPI00400922 | 209 kDa | 14 | 4%  | 9 | 18 | 7%  | 10 | 0  | 0%  | 0 |

|                                                                        |             |         |    |     |   |    |     |    |    |     |    |
|------------------------------------------------------------------------|-------------|---------|----|-----|---|----|-----|----|----|-----|----|
| 40S ribosomal protein S15a                                             | IPI00221091 | 15 kDa  | 6  | 15% | 3 | 11 | 33% | 3  | 0  | 0%  | 0  |
| THO complex subunit 4                                                  | IPI00328840 | 28 kDa  | 8  | 20% | 3 | 21 | 20% | 3  | 0  | 0%  | 0  |
| Cell growth-regulating nucleolar protein                               | IPI00015838 | 44 kDa  | 8  | 10% | 4 | 21 | 22% | 8  | 0  | 0%  | 0  |
| Staphylococcal nuclease domain-containing protein 1                    | IPI00140420 | 102 kDa | 3  | 4%  | 3 | 20 | 24% | 16 | 0  | 0%  | 0  |
| 40S ribosomal protein S11                                              | IPI00025091 | 18 kDa  | 9  | 14% | 4 | 12 | 18% | 3  | 0  | 0%  | 0  |
| Actin, alpha skeletal muscle                                           | IPI00021428 | 42 kDa  | 0  | 0%  | 0 | 8  | 10% | 2  | 16 | 15% | 3  |
| 60S ribosomal protein L18a                                             | IPI00026202 | 21 kDa  | 8  | 23% | 4 | 22 | 35% | 6  | 0  | 0%  | 0  |
| Myristoylated alanine-rich C-kinase substrate                          | IPI00219301 | 32 kDa  | 0  | 0%  | 0 | 0  | 0%  | 0  | 37 | 48% | 8  |
| Polycystin-2                                                           | IPI00299040 | 110 kDa | 8  | 5%  | 5 | 25 | 10% | 10 | 0  | 0%  | 0  |
| Histone H2B type 1-L                                                   | IPI00018534 | 14 kDa  | 0  | 0%  | 0 | 17 | 20% | 2  | 0  | 0%  | 0  |
| Isoform Long of Delta-1-pyrroline-5-carboxylate synthetase             | IPI00008982 | 87 kDa  | 0  | 0%  | 0 | 31 | 22% | 13 | 0  | 0%  | 0  |
| 60S ribosomal protein L22                                              | IPI00219153 | 15 kDa  | 12 | 19% | 2 | 20 | 30% | 3  | 0  | 0%  | 0  |
| Cytospin-A                                                             | IPI00178072 | 125 kDa | 0  | 0%  | 0 | 3  | 4%  | 3  | 24 | 14% | 13 |
| heat shock protein 90kDa alpha (cytosolic), class A member 1 isoform 1 | IPI00382470 | 98 kDa  | 7  | 6%  | 6 | 12 | 5%  | 7  | 4  | 4%  | 3  |
| Isoform 1 of Clathrin interactor 1                                     | IPI00291930 | 68 kDa  | 5  | 9%  | 5 | 22 | 14% | 12 | 0  | 0%  | 0  |
| 60S ribosomal protein L36                                              | IPI00216237 | 12 kDa  | 12 | 21% | 3 | 12 | 19% | 4  | 0  | 0%  | 0  |
| Isoform 1 of Breakpoint cluster region protein                         | IPI00004497 | 143 kDa | 0  | 0%  | 0 | 27 | 8%  | 12 | 0  | 0%  | 0  |
| cDNA FLJ60076, highly similar to ELAV-like protein 1                   | IPI00301936 | 39 kDa  | 5  | 14% | 4 | 24 | 24% | 6  | 0  | 0%  | 0  |
| Elongation factor 1-delta                                              | IPI00023048 | 31 kDa  | 9  | 9%  | 4 | 11 | 16% | 5  | 8  | 22% | 5  |
| eukaryotic translation initiation factor 4 gamma, 1 isoform 2          | IPI00384463 | 167 kDa | 12 | 4%  | 8 | 11 | 5%  | 6  | 0  | 0%  | 0  |
| ATP-dependent DNA helicase 2 subunit 1                                 | IPI00644712 | 70 kDa  | 5  | 11% | 5 | 18 | 20% | 11 | 0  | 0%  | 0  |
| rRNA 2'-O-methyltransferase fibrillar                                  | IPI00025039 | 34 kDa  | 2  | 6%  | 2 | 25 | 33% | 8  | 0  | 0%  | 0  |

|                                                                                                                                                   |             |         |    |     |   |    |     |    |   |     |   |
|---------------------------------------------------------------------------------------------------------------------------------------------------|-------------|---------|----|-----|---|----|-----|----|---|-----|---|
| Isoform 1 of Paraspeckle component 1                                                                                                              | IPI00103525 | 59 kDa  | 0  | 0%  | 0 | 21 | 20% | 8  | 0 | 0%  | 0 |
| Enhancer of rudimentary homolog                                                                                                                   | IPI00029631 | 12 kDa  | 11 | 18% | 2 | 15 | 25% | 4  | 4 | 18% | 2 |
| 40S ribosomal protein S20                                                                                                                         | IPI00012493 | 13 kDa  | 13 | 19% | 3 | 8  | 23% | 3  | 3 | 15% | 2 |
| Isoform 1 of Heterogeneous nuclear ribonucleoprotein A3                                                                                           | IPI00419373 | 40 kDa  | 0  | 0%  | 0 | 17 | 25% | 8  | 0 | 0%  | 0 |
| Isoform 1 of Fragile X mental retardation 1 protein                                                                                               | IPI00215720 | 67 kDa  | 6  | 9%  | 4 | 16 | 10% | 8  | 0 | 0%  | 0 |
| Isoform 1 of FCH domain only protein 2                                                                                                            | IPI00472794 | 89 kDa  | 0  | 0%  | 0 | 27 | 23% | 12 | 0 | 0%  | 0 |
| Isoform 1 of Bcl-2-associated transcription factor 1                                                                                              | IPI00006079 | 106 kDa | 9  | 5%  | 8 | 12 | 5%  | 6  | 2 | 1%  | 2 |
| Histone H2A type 1-H                                                                                                                              | IPI00081836 | 14 kDa  | 6  | 30% | 3 | 0  | 0%  | 0  | 0 | 0%  | 0 |
| RNA-binding protein 34                                                                                                                            | IPI00181617 | 49 kDa  | 3  | 8%  | 3 | 18 | 27% | 9  | 0 | 0%  | 0 |
| Heterogeneous nuclear ribonucleoprotein G                                                                                                         | IPI00304692 | 42 kDa  | 6  | 12% | 4 | 13 | 20% | 7  | 0 | 0%  | 0 |
| Histone H1.4                                                                                                                                      | IPI00217467 | 22 kDa  | 14 | 18% | 4 | 6  | 9%  | 2  | 5 | 9%  | 2 |
| 40S ribosomal protein S12                                                                                                                         | IPI00013917 | 15 kDa  | 11 | 24% | 2 | 8  | 30% | 3  | 4 | 24% | 2 |
| Stress-70 protein, mitochondrial                                                                                                                  | IPI00007765 | 74 kDa  | 3  | 4%  | 3 | 18 | 16% | 9  | 0 | 0%  | 0 |
| poly(rC) binding protein 2 isoform b                                                                                                              | IPI00012066 | 38 kDa  | 6  | 7%  | 2 | 18 | 15% | 4  | 0 | 0%  | 0 |
| Isoform 1 of RNA-binding protein 14                                                                                                               | IPI00013174 | 69 kDa  | 5  | 9%  | 4 | 14 | 14% | 7  | 0 | 0%  | 0 |
| Isoform 2 of Ubiquitin-associated protein 2-like                                                                                                  | IPI00029019 | 105 kDa | 8  | 9%  | 5 | 11 | 10% | 7  | 0 | 0%  | 0 |
| Isoform 1 of DAZ-associated protein 1                                                                                                             | IPI00165230 | 43 kDa  | 8  | 11% | 3 | 15 | 11% | 3  | 0 | 0%  | 0 |
| EBNA1 binding protein 2<br>cDNA FLJ36192 fis, clone<br>TESTI2027450, highly similar to<br>Eukaryotic translation initiation factor<br>3 subunit 5 | IPI00745955 | 41 kDa  | 0  | 0%  | 0 | 17 | 24% | 6  | 0 | 0%  | 0 |
| Isoform 1 of Heterochromatin protein<br>1-binding protein 3                                                                                       | IPI00642238 | 61 kDa  | 2  | 3%  | 2 | 16 | 13% | 6  | 0 | 0%  | 0 |
| peptidylprolyl isomerase B precursor                                                                                                              | IPI00646304 | 24 kDa  | 0  | 0%  | 0 | 16 | 23% | 4  | 0 | 0%  | 0 |
| Nucleosome assembly protein 1-like 1                                                                                                              | IPI00023860 | 45 kDa  | 0  | 0%  | 0 | 17 | 20% | 6  | 0 | 0%  | 0 |

|                                                                                          |             |         |    |     |   |    |     |    |    |     |   |
|------------------------------------------------------------------------------------------|-------------|---------|----|-----|---|----|-----|----|----|-----|---|
| Isoform 1 of Heterogeneous nuclear ribonucleoprotein H3                                  | IPI00013877 | 37 kDa  | 5  | 12% | 4 | 16 | 21% | 6  | 0  | 0%  | 0 |
| Heterogeneous nuclear ribonucleoprotein F                                                | IPI00003881 | 46 kDa  | 5  | 8%  | 3 | 12 | 16% | 4  | 0  | 0%  | 0 |
| Sorting nexin-9                                                                          | IPI00001883 | 67 kDa  | 14 | 22% | 7 | 2  | 3%  | 2  | 0  | 0%  | 0 |
| cDNA FLJ56389, highly similar to Elongation factor 1-gamma                               | IPI00000875 | 56 kDa  | 6  | 5%  | 3 | 7  | 3%  | 3  | 6  | 5%  | 3 |
| Uncharacterized protein C11orf84                                                         | IPI00106955 | 41 kDa  | 9  | 24% | 7 | 0  | 0%  | 0  | 11 | 22% | 6 |
| Heterogeneous nuclear ribonucleoprotein R                                                | IPI00012074 | 71 kDa  | 0  | 0%  | 0 | 17 | 7%  | 4  | 0  | 0%  | 0 |
| Heterogeneous nuclear ribonucleoprotein A0                                               | IPI00011913 | 31 kDa  | 6  | 14% | 3 | 14 | 19% | 4  | 0  | 0%  | 0 |
| Isoform 1 of Calcium-binding and coiled-coil domain-containing protein 1                 | IPI00011232 | 77 kDa  | 0  | 0%  | 0 | 18 | 13% | 8  | 0  | 0%  | 0 |
| AP-2 associated kinase 1                                                                 | IPI00479760 | 104 kDa | 0  | 0%  | 0 | 18 | 8%  | 8  | 0  | 0%  | 0 |
| KH-type splicing regulatory protein                                                      | IPI00479786 | 73 kDa  | 0  | 0%  | 0 | 16 | 23% | 11 | 0  | 0%  | 0 |
| 60S ribosomal protein L30                                                                | IPI00219156 | 13 kDa  | 14 | 43% | 5 | 0  | 0%  | 0  | 0  | 0%  | 0 |
| Voltage-dependent anion-selective channel protein 1                                      | IPI00216308 | 31 kDa  | 5  | 12% | 3 | 8  | 30% | 6  | 0  | 0%  | 0 |
| Tubulin beta-2C chain                                                                    | IPI00007752 | 50 kDa  | 4  | 6%  | 3 | 10 | 9%  | 3  | 2  | 3%  | 2 |
| Methylosome protein 50                                                                   | IPI00012202 | 37 kDa  | 8  | 18% | 4 | 6  | 6%  | 3  | 0  | 0%  | 0 |
| Probable ATP-dependent RNA helicase DDX41                                                | IPI00007208 | 70 kDa  | 9  | 13% | 8 | 6  | 7%  | 5  | 0  | 0%  | 0 |
| Isoform 1 of KH domain-containing, RNA-binding, signal transduction-associated protein 1 | IPI00008575 | 48 kDa  | 0  | 0%  | 0 | 12 | 8%  | 3  | 0  | 0%  | 0 |
| Uncharacterized protein FLJ45252                                                         | IPI00397883 | 38 kDa  | 0  | 0%  | 0 | 20 | 26% | 6  | 0  | 0%  | 0 |
| 59 kDa protein                                                                           | IPI00302925 | 59 kDa  | 9  | 5%  | 7 | 2  | 4%  | 2  | 2  | 4%  | 2 |
| Transitional endoplasmic reticulum ATPase                                                | IPI00022774 | 89 kDa  | 7  | 6%  | 4 | 8  | 6%  | 5  | 3  | 4%  | 2 |
| Eukaryotic translation initiation factor 3 subunit A                                     | IPI00029012 | 167 kDa | 6  | 4%  | 6 | 5  | 3%  | 4  | 0  | 0%  | 0 |
| Glutamate-rich WD repeat-containing protein 1                                            | IPI00027831 | 49 kDa  | 4  | 13% | 4 | 9  | 14% | 4  | 0  | 0%  | 0 |

|                                                                                     |             |         |   |     |   |    |     |    |    |    |   |
|-------------------------------------------------------------------------------------|-------------|---------|---|-----|---|----|-----|----|----|----|---|
| Leucine-rich PPR motif-containing protein, mitochondrial                            | IPI00783271 | 158 kDa | 0 | 0%  | 0 | 11 | 8%  | 9  | 0  | 0% | 0 |
| Isoform B of Ras GTPase-activating protein-binding protein 2                        | IPI00179890 | 51 kDa  | 3 | 8%  | 2 | 5  | 11% | 3  | 0  | 0% | 0 |
| Isoform 1 of Protein phosphatase 1 regulatory subunit 12A                           | IPI00183002 | 115 kDa | 0 | 0%  | 0 | 0  | 0%  | 0  | 11 | 9% | 7 |
| chaperonin containing TCP1, subunit 3 isoform b                                     | IPI00290770 | 60 kDa  | 6 | 6%  | 4 | 4  | 7%  | 3  | 3  | 9% | 3 |
| Nucleoplasmin-3                                                                     | IPI00026496 | 19 kDa  | 0 | 0%  | 0 | 10 | 17% | 2  | 0  | 0% | 0 |
| Treacher Collins-Franceschetti syndrome 1 isoform a                                 | IPI00165041 | 148 kDa | 3 | 1%  | 2 | 0  | 0%  | 0  | 0  | 0% | 0 |
| Isoform Gamma-1 of Serine/threonine-protein phosphatase PP1-gamma catalytic subunit | IPI00005705 | 37 kDa  | 8 | 7%  | 2 | 8  | 7%  | 2  | 0  | 0% | 0 |
| Nucleolar protein 5                                                                 | IPI00006379 | 60 kDa  | 3 | 5%  | 3 | 6  | 15% | 5  | 0  | 0% | 0 |
| T-complex protein 1 subunit zeta                                                    | IPI00027626 | 58 kDa  | 0 | 0%  | 0 | 8  | 8%  | 5  | 0  | 0% | 0 |
| similar to insulinoma protein                                                       | IPI00455479 | 17 kDa  | 7 | 24% | 3 | 6  | 24% | 2  | 0  | 0% | 0 |
| Keratin, type II cytoskeletal 6B                                                    | IPI00293665 | 60 kDa  | 7 | 5%  | 2 | 4  | 5%  | 2  | 0  | 0% | 0 |
| Dynein light chain 1, cytoplasmic                                                   | IPI00019329 | 10 kDa  | 5 | 26% | 2 | 8  | 13% | 2  | 0  | 0% | 0 |
| Lupus La protein                                                                    | IPI00009032 | 47 kDa  | 5 | 10% | 4 | 5  | 10% | 3  | 2  | 7% | 2 |
| Isoform 1 of Polyadenylate-binding protein 4                                        | IPI00012726 | 71 kDa  | 0 | 0%  | 0 | 11 | 8%  | 6  | 0  | 0% | 0 |
| Eukaryotic initiation factor 4A-I                                                   | IPI00025491 | 46 kDa  | 4 | 12% | 4 | 9  | 13% | 4  | 0  | 0% | 0 |
| ATP synthase subunit beta, mitochondrial                                            | IPI00303476 | 57 kDa  | 2 | 5%  | 2 | 12 | 22% | 10 | 0  | 0% | 0 |
| Isoform 1 of RNA-binding protein 39                                                 | IPI00163505 | 59 kDa  | 0 | 0%  | 0 | 12 | 20% | 8  | 0  | 0% | 0 |
| 2,4-dienoyl-CoA reductase, mitochondrial                                            | IPI00003482 | 36 kDa  | 7 | 14% | 4 | 0  | 0%  | 0  | 0  | 0% | 0 |
| Isoform 2 of Spliceosome RNA helicase BAT1                                          | IPI00641829 | 51 kDa  | 4 | 3%  | 2 | 8  | 8%  | 4  | 0  | 0% | 0 |
| Importin subunit beta-1                                                             | IPI00001639 | 97 kDa  | 0 | 0%  | 0 | 8  | 6%  | 4  | 0  | 0% | 0 |
| Isoform 1 of Heterogeneous nuclear ribonucleoprotein U-like protein 1               | IPI00013070 | 96 kDa  | 3 | 6%  | 3 | 5  | 6%  | 5  | 0  | 0% | 0 |
| Isoform 1 of DNA-dependent protein kinase catalytic subunit                         | IPI00296337 | 469 kDa | 5 | 1%  | 4 | 4  | 1%  | 4  | 0  | 0% | 0 |

|                                                                                  |             |         |   |     |   |    |     |   |   |     |   |
|----------------------------------------------------------------------------------|-------------|---------|---|-----|---|----|-----|---|---|-----|---|
| Isoform 1 of U5 small nuclear ribonucleoprotein 200 kDa helicase                 | IPI00420014 | 245 kDa | 5 | 2%  | 5 | 5  | 2%  | 4 | 0 | 0%  | 0 |
| Glyceraldehyde-3-phosphate dehydrogenase                                         | IPI00219018 | 36 kDa  | 6 | 13% | 5 | 3  | 7%  | 3 | 3 | 12% | 2 |
| 14-3-3 protein zeta/delta                                                        | IPI00021263 | 28 kDa  | 4 | 9%  | 3 | 5  | 9%  | 2 | 0 | 0%  | 0 |
| Isoform C1 of Heterogeneous nuclear ribonucleoproteins C1/C2                     | IPI00216592 | 32 kDa  | 0 | 0%  | 0 | 10 | 10% | 5 | 0 | 0%  | 0 |
| 39S ribosomal protein L12, mitochondrial                                         | IPI00005537 | 21 kDa  | 0 | 0%  | 0 | 5  | 13% | 3 | 3 | 13% | 2 |
| Cytoplasmic dynein 1 heavy chain 1                                               | IPI00456969 | 532 kDa | 5 | 1%  | 5 | 3  | 1%  | 3 | 0 | 0%  | 0 |
| Splicing factor, arginine/serine-rich 2                                          | IPI00005978 | 25 kDa  | 3 | 15% | 2 | 6  | 15% | 2 | 0 | 0%  | 0 |
| Isoform 1 of Enhancer of mRNA-decapping protein 4                                | IPI00376317 | 152 kDa | 0 | 0%  | 0 | 10 | 6%  | 6 | 0 | 0%  | 0 |
| Ras-related protein Ral-A                                                        | IPI00217519 | 24 kDa  | 0 | 0%  | 0 | 0  | 0%  | 0 | 7 | 23% | 4 |
| Spindlin-1                                                                       | IPI00550655 | 30 kDa  | 0 | 0%  | 0 | 0  | 0%  | 0 | 3 | 14% | 3 |
| 60S ribosomal protein L32                                                        | IPI00395998 | 16 kDa  | 0 | 0%  | 0 | 4  | 16% | 3 | 0 | 0%  | 0 |
| 60S ribosomal protein L35a                                                       | IPI00029731 | 13 kDa  | 0 | 0%  | 0 | 4  | 26% | 3 | 0 | 0%  | 0 |
| Signal recognition particle 14 kDa protein                                       | IPI00293434 | 15 kDa  | 0 | 0%  | 0 | 11 | 18% | 3 | 0 | 0%  | 0 |
| H/ACA ribonucleoprotein complex subunit 4                                        | IPI00221394 | 58 kDa  | 5 | 4%  | 2 | 5  | 11% | 4 | 0 | 0%  | 0 |
| Histone H1.0                                                                     | IPI00550239 | 21 kDa  | 7 | 19% | 4 | 0  | 0%  | 0 | 0 | 0%  | 0 |
| cDNA FLJ31747 fis, clone NT2RI2007377, highly similar to RNA-BINDING PROTEIN EWS | IPI00009841 | 69 kDa  | 0 | 0%  | 0 | 11 | 10% | 5 | 0 | 0%  | 0 |
| Isoform 1 of Caprin-1                                                            | IPI00783872 | 78 kDa  | 0 | 0%  | 0 | 7  | 9%  | 5 | 0 | 0%  | 0 |
| Eukaryotic translation initiation factor 2 subunit 1                             | IPI00219678 | 36 kDa  | 7 | 15% | 4 | 5  | 9%  | 2 | 0 | 0%  | 0 |
| Isoform 1 of YTH domain family protein 2                                         | IPI00306043 | 62 kDa  | 0 | 0%  | 0 | 8  | 11% | 5 | 0 | 0%  | 0 |
| FACT complex subunit SPT16                                                       | IPI00026970 | 120 kDa | 0 | 0%  | 0 | 11 | 8%  | 6 | 0 | 0%  | 0 |
| T-complex protein 1 subunit eta                                                  | IPI00018465 | 59 kDa  | 3 | 5%  | 3 | 3  | 7%  | 3 | 2 | 2%  | 2 |
| Period circadian protein homolog 1                                               | IPI00440484 | 136 kDa | 0 | 0%  | 0 | 9  | 4%  | 2 | 0 | 0%  | 0 |

|                                                                    |             |         |   |     |   |    |     |   |   |    |   |
|--------------------------------------------------------------------|-------------|---------|---|-----|---|----|-----|---|---|----|---|
| Fragile X mental retardation syndrome-related protein 2            | IPI00016250 | 77 kDa  | 0 | 0%  | 0 | 7  | 4%  | 3 | 0 | 0% | 0 |
| Isoform Long of Antigen KI-67                                      | IPI00004233 | 359 kDa | 5 | 1%  | 3 | 2  | 1%  | 2 | 0 | 0% | 0 |
| Isoform 1 of Transcription intermediary factor 1-beta              | IPI00438229 | 89 kDa  | 0 | 0%  | 0 | 11 | 6%  | 4 | 0 | 0% | 0 |
| Uncharacterized protein ENSP00000260968                            | IPI00479058 | 17 kDa  | 6 | 22% | 2 | 0  | 0%  | 0 | 0 | 0% | 0 |
| Isoform 1 of Filamin-B                                             | IPI00289334 | 278 kDa | 0 | 0%  | 0 | 0  | 0%  | 0 | 5 | 2% | 3 |
| Isoform 1 of Nuclear protein NP60                                  | IPI00000155 | 61 kDa  | 0 | 0%  | 0 | 9  | 10% | 5 | 0 | 0% | 0 |
| Matrin-3                                                           | IPI00017297 | 95 kDa  | 0 | 0%  | 0 | 8  | 8%  | 6 | 0 | 0% | 0 |
| KRR1 small subunit processome component homolog                    | IPI00156032 | 44 kDa  | 3 | 6%  | 2 | 5  | 9%  | 3 | 0 | 0% | 0 |
| ADP/ATP translocase 2                                              | IPI00007188 | 33 kDa  | 0 | 0%  | 0 | 10 | 20% | 5 | 0 | 0% | 0 |
| Stress-induced-phosphoprotein 1                                    | IPI00013894 | 63 kDa  | 3 | 4%  | 2 | 0  | 0%  | 0 | 0 | 0% | 0 |
| Splicing factor, arginine/serine-rich 4                            | IPI00000015 | 57 kDa  | 0 | 0%  | 0 | 4  | 5%  | 3 | 0 | 0% | 0 |
| Isoform 1 of E3 ubiquitin-protein ligase Praja2                    | IPI00006557 | 78 kDa  | 0 | 0%  | 0 | 10 | 7%  | 5 | 0 | 0% | 0 |
| Prolactin-inducible protein                                        | IPI00022974 | 17 kDa  | 9 | 19% | 3 | 0  | 0%  | 0 | 0 | 0% | 0 |
| Isoform 2 of U1 small nuclear ribonucleoprotein 70 kDa             | IPI00219483 | 51 kDa  | 2 | 4%  | 2 | 3  | 6%  | 2 | 0 | 0% | 0 |
| Putative pre-mRNA-splicing factor ATP-dependent RNA helicase DHX15 | IPI00396435 | 91 kDa  | 0 | 0%  | 0 | 6  | 5%  | 3 | 0 | 0% | 0 |
| RNA-binding protein 28                                             | IPI00304187 | 86 kDa  | 0 | 0%  | 0 | 5  | 7%  | 5 | 0 | 0% | 0 |
| Uncharacterized protein C7orf50                                    | IPI00031651 | 22 kDa  | 0 | 0%  | 0 | 7  | 24% | 3 | 0 | 0% | 0 |
| H/ACA ribonucleoprotein complex subunit 2                          | IPI00041325 | 17 kDa  | 0 | 0%  | 0 | 8  | 19% | 2 | 0 | 0% | 0 |
| Isoform 1 of Drebrin                                               | IPI00003406 | 71 kDa  | 0 | 0%  | 0 | 0  | 0%  | 0 | 6 | 5% | 3 |
| Isoform 1 of Splicing factor U2AF 65 kDa subunit                   | IPI00031556 | 54 kDa  | 0 | 0%  | 0 | 8  | 17% | 4 | 0 | 0% | 0 |
| 40S ribosomal protein S27                                          | IPI00513971 | 9 kDa   | 5 | 30% | 2 | 5  | 30% | 3 | 0 | 0% | 0 |
| 40S ribosomal protein S21                                          | IPI00017448 | 9 kDa   | 5 | 41% | 3 | 0  | 0%  | 0 | 0 | 0% | 0 |
| Putative uncharacterized protein DKFZp686E2459                     | IPI00375731 | 110 kDa | 4 | 4%  | 4 | 0  | 0%  | 0 | 0 | 0% | 0 |

|                                                                 |             |         |    |     |   |   |     |   |   |     |   |
|-----------------------------------------------------------------|-------------|---------|----|-----|---|---|-----|---|---|-----|---|
| Isoform Beta-2 of DNA topoisomerase 2-beta                      | IPI00027280 | 183 kDa | 4  | 2%  | 3 | 3 | 2%  | 3 | 0 | 0%  | 0 |
| Serine/threonine-protein phosphatase PPI-beta catalytic subunit | IPI00218236 | 37 kDa  | 0  | 0%  | 0 | 5 | 14% | 4 | 0 | 0%  | 0 |
| Gamma-glutamyl hydrolase                                        | IPI00023728 | 36 kDa  | 0  | 0%  | 0 | 9 | 19% | 5 | 0 | 0%  | 0 |
| Isoform 1 of Putative helicase MOV-10                           | IPI00444452 | 114 kDa | 2  | 3%  | 2 | 5 | 6%  | 5 | 0 | 0%  | 0 |
| U1 small nuclear ribonucleoprotein A                            | IPI00012382 | 31 kDa  | 3  | 13% | 2 | 5 | 22% | 4 | 0 | 0%  | 0 |
| Eukaryotic translation initiation factor 2 subunit 2            | IPI00021728 | 38 kDa  | 0  | 0%  | 0 | 6 | 17% | 4 | 0 | 0%  | 0 |
| Importin subunit alpha-2                                        | IPI00002214 | 58 kDa  | 0  | 0%  | 0 | 6 | 10% | 3 | 0 | 0%  | 0 |
| Histone H4                                                      | IPI00453473 | 11 kDa  | 3  | 21% | 2 | 0 | 0%  | 0 | 0 | 0%  | 0 |
| Glutamyl-peptide cyclotransferase                               | IPI00003919 | 41 kDa  | 2  | 8%  | 2 | 5 | 20% | 4 | 0 | 0%  | 0 |
| Putative rRNA methyltransferase 3                               | IPI00217686 | 97 kDa  | 0  | 0%  | 0 | 6 | 4%  | 3 | 0 | 0%  | 0 |
| Keratin, type I cytoskeletal 17                                 | IPI00450768 | 48 kDa  | 10 | 12% | 5 | 0 | 0%  | 0 | 0 | 0%  | 0 |
| Nucleolysin TIAR                                                | IPI00005615 | 42 kDa  | 0  | 0%  | 0 | 7 | 6%  | 2 | 0 | 0%  | 0 |
| Isoform 1 of Acyl-CoA dehydrogenase family member 11            | IPI00420065 | 87 kDa  | 0  | 0%  | 0 | 8 | 6%  | 3 | 0 | 0%  | 0 |
| Isoform Short of TATA-binding protein-associated factor 2N      | IPI00020194 | 62 kDa  | 0  | 0%  | 0 | 8 | 9%  | 3 | 0 | 0%  | 0 |
| polymerase (RNA) I polypeptide A, 194kDa                        | IPI00031960 | 195 kDa | 4  | 3%  | 4 | 0 | 0%  | 0 | 0 | 0%  | 0 |
| Isoform 1 of Spectrin beta chain, brain 2                       | IPI00012645 | 271 kDa | 0  | 0%  | 0 | 0 | 0%  | 0 | 5 | 2%  | 4 |
| Isoform 2 of ELKS/RAB6-interacting/CAST family member 1         | IPI00171230 | 114 kDa | 0  | 0%  | 0 | 0 | 0%  | 0 | 5 | 6%  | 4 |
| Isoform 3 of Tyrosine-protein phosphatase non-receptor type 13  | IPI00006714 | 275 kDa | 0  | 0%  | 0 | 0 | 0%  | 0 | 6 | 3%  | 6 |
| NF-kappa-B-activating protein                                   | IPI00296934 | 47 kDa  | 4  | 11% | 2 | 4 | 11% | 3 | 0 | 0%  | 0 |
| Ribose-phosphate pyrophosphokinase 1                            | IPI00219616 | 35 kDa  | 0  | 0%  | 0 | 0 | 0%  | 0 | 4 | 13% | 3 |
| Histone-binding protein RBBP4                                   | IPI00328319 | 48 kDa  | 0  | 0%  | 0 | 4 | 6%  | 2 | 0 | 0%  | 0 |
| T-complex protein 1 subunit delta                               | IPI00302927 | 58 kDa  | 6  | 6%  | 4 | 0 | 0%  | 0 | 2 | 5%  | 2 |
| Isoform 1 of MYC-induced nuclear                                | IPI00216737 | 53 kDa  | 4  | 10% | 3 | 4 | 6%  | 2 | 0 | 0%  | 0 |



## antigen

|                                                                                            |             |         |   |     |   |   |     |   |   |     |   |
|--------------------------------------------------------------------------------------------|-------------|---------|---|-----|---|---|-----|---|---|-----|---|
| Splicing factor, arginine/serine-rich 9 Isoform 1 of RNA-binding protein Musashi homolog 2 | IPI00012340 | 26 kDa  | 0 | 0%  | 0 | 5 | 16% | 4 | 0 | 0%  | 0 |
| Isoform 2 of Splicing factor 1                                                             | IPI00294627 | 69 kDa  | 0 | 0%  | 0 | 4 | 7%  | 4 | 0 | 0%  | 0 |
| Isoform 1 of Ataxin-2-like protein                                                         | IPI00456359 | 113 kDa | 2 | 5%  | 2 | 4 | 5%  | 4 | 0 | 0%  | 0 |
| Serine hydroxymethyltransferase, mitochondrial                                             | IPI00002520 | 56 kDa  | 0 | 0%  | 0 | 6 | 11% | 5 | 0 | 0%  | 0 |
| ATP synthase subunit alpha, mitochondrial                                                  | IPI00440493 | 60 kDa  | 0 | 0%  | 0 | 5 | 10% | 4 | 0 | 0%  | 0 |
| Superkiller viralicidic activity 2-like 2                                                  | IPI00647217 | 118 kDa | 0 | 0%  | 0 | 6 | 5%  | 4 | 0 | 0%  | 0 |
| Isoform 2 of Basigin                                                                       | IPI00019906 | 29 kDa  | 0 | 0%  | 0 | 0 | 0%  | 0 | 5 | 15% | 3 |
| 65 kDa Yes-associated protein                                                              | IPI00009326 | 49 kDa  | 0 | 0%  | 0 | 0 | 0%  | 0 | 7 | 6%  | 2 |
| Testis-specific gene 118 protein                                                           | IPI00554560 | 52 kDa  | 3 | 6%  | 2 | 0 | 0%  | 0 | 0 | 0%  | 0 |
| KN motif and ankyrin repeat domain-containing protein 1                                    | IPI00339320 | 147 kDa | 0 | 0%  | 0 | 3 | 2%  | 3 | 0 | 0%  | 0 |
| Isoform 3 of Heterogeneous nuclear ribonucleoprotein D-like                                | IPI00045498 | 27 kDa  | 0 | 0%  | 0 | 6 | 19% | 4 | 0 | 0%  | 0 |
| insulin-like growth factor 2 mRNA binding protein 2 isoform a                              | IPI00179713 | 66 kDa  | 0 | 0%  | 0 | 4 | 8%  | 3 | 0 | 0%  | 0 |
| Probable ATP-dependent RNA helicase DDX47                                                  | IPI00023972 | 51 kDa  | 0 | 0%  | 0 | 6 | 10% | 4 | 0 | 0%  | 0 |
| Eukaryotic translation initiation factor 2 subunit 3                                       | IPI00297982 | 51 kDa  | 0 | 0%  | 0 | 5 | 12% | 3 | 0 | 0%  | 0 |
| Exosome complex exonuclease RRP46                                                          | IPI00015955 | 25 kDa  | 0 | 0%  | 0 | 5 | 9%  | 2 | 0 | 0%  | 0 |
| Protein S100-A9                                                                            | IPI00027462 | 13 kDa  | 6 | 38% | 3 | 0 | 0%  | 0 | 0 | 0%  | 0 |
| TDP43                                                                                      | IPI00025815 | 45 kDa  | 0 | 0%  | 0 | 5 | 10% | 3 | 0 | 0%  | 0 |
| PRKAR2A protein                                                                            | IPI00063234 | 43 kDa  | 0 | 0%  | 0 | 3 | 10% | 3 | 0 | 0%  | 0 |
| Nucleolar GTP-binding protein 1                                                            | IPI00385042 | 74 kDa  | 0 | 0%  | 0 | 4 | 6%  | 4 | 0 | 0%  | 0 |
| Isoform 2 of DNA-directed RNA polymerase I subunit RPA49                                   | IPI00550638 | 47 kDa  | 0 | 0%  | 0 | 7 | 14% | 5 | 0 | 0%  | 0 |
| Isoform 1 of Malonyl CoA-acyl carrier protein transacylase, mitochondrial                  | IPI00023359 | 43 kDa  | 0 | 0%  | 0 | 7 | 12% | 4 | 0 | 0%  | 0 |

|                                                                              |             |         |   |    |   |   |     |   |   |     |   |
|------------------------------------------------------------------------------|-------------|---------|---|----|---|---|-----|---|---|-----|---|
| T-complex protein 1 subunit epsilon                                          | IPI00010720 | 60 kDa  | 0 | 0% | 0 | 3 | 6%  | 3 | 0 | 0%  | 0 |
| Microtubule-associated protein 1B                                            | IPI00008868 | 271 kDa | 3 | 1% | 2 | 0 | 0%  | 0 | 0 | 0%  | 0 |
| Eukaryotic translation initiation factor 6                                   | IPI00010105 | 27 kDa  | 0 | 0% | 0 | 5 | 13% | 2 | 0 | 0%  | 0 |
| Isoform 1 of Eukaryotic translation initiation factor 3 subunit B            | IPI00396370 | 92 kDa  | 0 | 0% | 0 | 3 | 3%  | 3 | 0 | 0%  | 0 |
| Splicing factor 3B subunit 1                                                 | IPI00026089 | 146 kDa | 3 | 3% | 3 | 3 | 2%  | 2 | 0 | 0%  | 0 |
| Isoform 1 of Splicing factor, arginine/serine-rich 7                         | IPI00003377 | 27 kDa  | 0 | 0% | 0 | 5 | 18% | 3 | 0 | 0%  | 0 |
| Lamina-associated polypeptide 2 isoform alpha                                | IPI00216230 | 75 kDa  | 0 | 0% | 0 | 3 | 3%  | 2 | 0 | 0%  | 0 |
| Isoform 1 of Regulator of nonsense transcripts 3B                            | IPI00023409 | 58 kDa  | 0 | 0% | 0 | 4 | 7%  | 3 | 0 | 0%  | 0 |
| Isoform 1 of Replication factor C subunit 1                                  | IPI00375358 | 128 kDa | 0 | 0% | 0 | 4 | 3%  | 2 | 0 | 0%  | 0 |
| Isoform M1 of Pyruvate kinase isozymes M1/M2                                 | IPI00220644 | 58 kDa  | 2 | 6% | 2 | 0 | 0%  | 0 | 0 | 0%  | 0 |
| Ras-related protein Rab-35                                                   | IPI00300096 | 23 kDa  | 0 | 0% | 0 | 0 | 0%  | 0 | 6 | 24% | 4 |
| CCAAT/enhancer-binding protein zeta                                          | IPI00306723 | 121 kDa | 0 | 0% | 0 | 6 | 6%  | 5 | 0 | 0%  | 0 |
| Protein flightless-1 homolog                                                 | IPI00031023 | 145 kDa | 0 | 0% | 0 | 0 | 0%  | 0 | 4 | 3%  | 3 |
| Isoform 2 of Protein KRI1 homolog                                            | IPI00186139 | 83 kDa  | 0 | 0% | 0 | 4 | 5%  | 3 | 0 | 0%  | 0 |
| Isoform 1 of Melanoma-associated antigen D1                                  | IPI00328354 | 86 kDa  | 0 | 0% | 0 | 6 | 3%  | 4 | 0 | 0%  | 0 |
| Isoform 2 of Exosome complex exonuclease RRP45                               | IPI00029697 | 51 kDa  | 0 | 0% | 0 | 3 | 5%  | 2 | 0 | 0%  | 0 |
| Isoform 1 of Pyruvate dehydrogenase E1 component subunit beta, mitochondrial | IPI00003925 | 39 kDa  | 0 | 0% | 0 | 0 | 0%  | 0 | 2 | 8%  | 2 |
| Complement component 1 Q subcomponent-binding protein, mitochondrial         | IPI00014230 | 31 kDa  | 0 | 0% | 0 | 5 | 11% | 3 | 0 | 0%  | 0 |
| Serine/threonine-protein kinase 38-like                                      | IPI00237011 | 54 kDa  | 3 | 5% | 2 | 0 | 0%  | 0 | 0 | 0%  | 0 |
| DNA topoisomerase 2 (Fragment)                                               | IPI00178667 | 183 kDa | 2 | 1% | 2 | 3 | 1%  | 2 | 0 | 0%  | 0 |
| RRP15-like protein                                                           | IPI00007004 | 31 kDa  | 0 | 0% | 0 | 4 | 8%  | 2 | 0 | 0%  | 0 |

|                                                                           |             |         |   |     |   |   |     |   |   |     |   |
|---------------------------------------------------------------------------|-------------|---------|---|-----|---|---|-----|---|---|-----|---|
| Eukaryotic translation initiation factor 3, subunit E interacting protein | IPI00465233 | 71 kDa  | 2 | 5%  | 2 | 0 | 0%  | 0 | 0 | 0%  | 0 |
| Growth-inhibiting protein 12                                              | IPI00298860 | 78 kDa  | 4 | 5%  | 3 | 0 | 0%  | 0 | 0 | 0%  | 0 |
| Brix domain-containing protein 2                                          | IPI00181728 | 41 kDa  | 0 | 0%  | 0 | 2 | 7%  | 2 | 0 | 0%  | 0 |
| Periodic tryptophan protein 2 homolog                                     | IPI00300078 | 102 kDa | 0 | 0%  | 0 | 3 | 3%  | 2 | 0 | 0%  | 0 |
| Flotillin-1                                                               | IPI00027438 | 47 kDa  | 0 | 0%  | 0 | 0 | 0%  | 0 | 5 | 10% | 3 |
| Ras-related protein R-Ras2                                                | IPI00012512 | 23 kDa  | 0 | 0%  | 0 | 0 | 0%  | 0 | 4 | 13% | 2 |
| Replication factor C subunit 4                                            | IPI00017381 | 40 kDa  | 0 | 0%  | 0 | 2 | 6%  | 2 | 0 | 0%  | 0 |
| Isoform alpha-enolase of Alpha-enolase                                    | IPI00465248 | 47 kDa  | 0 | 0%  | 0 | 0 | 0%  | 0 | 2 | 7%  | 2 |
| Nucleolar pre-ribosomal-associated protein 1                              | IPI00297241 | 254 kDa | 2 | 1%  | 2 | 0 | 0%  | 0 | 0 | 0%  | 0 |
| Mitochondrial PDHA1                                                       | IPI00306301 | 48 kDa  | 2 | 6%  | 2 | 0 | 0%  | 0 | 0 | 0%  | 0 |
| Uncharacterized protein C9orf114                                          | IPI00844014 | 42 kDa  | 0 | 0%  | 0 | 3 | 7%  | 2 | 0 | 0%  | 0 |
| Isoform 1 of RalBP1-associated Eps domain-containing protein 2            | IPI00382936 | 72 kDa  | 0 | 0%  | 0 | 3 | 7%  | 3 | 0 | 0%  | 0 |
| Heterogeneous nuclear ribonucleoprotein H2                                | IPI00026230 | 49 kDa  | 0 | 0%  | 0 | 5 | 9%  | 2 | 0 | 0%  | 0 |
| annexin A2 isoform 1                                                      | IPI00418169 | 40 kDa  | 3 | 11% | 3 | 0 | 0%  | 0 | 0 | 0%  | 0 |
| ATP-dependent RNA helicase DDX50                                          | IPI00031554 | 83 kDa  | 0 | 0%  | 0 | 3 | 5%  | 3 | 0 | 0%  | 0 |
| Interferon-induced, double-stranded RNA-activated protein kinase          | IPI00019463 | 62 kDa  | 0 | 0%  | 0 | 3 | 7%  | 3 | 0 | 0%  | 0 |
| 10-formyltetrahydrofolate dehydrogenase                                   | IPI00290553 | 99 kDa  | 0 | 0%  | 0 | 4 | 6%  | 4 | 0 | 0%  | 0 |
| MKI67 FHA domain-interacting nucleolar phosphoprotein                     | IPI00154590 | 34 kDa  | 0 | 0%  | 0 | 4 | 14% | 3 | 0 | 0%  | 0 |
| UPF0568 protein C14orf166                                                 | IPI00006980 | 28 kDa  | 0 | 0%  | 0 | 4 | 16% | 3 | 0 | 0%  | 0 |
| Isoform 3 of Formin-like protein 2                                        | IPI00044748 | 124 kDa | 0 | 0%  | 0 | 0 | 0%  | 0 | 4 | 3%  | 3 |
| Guanine nucleotide-binding protein alpha-13 subunit                       | IPI00290928 | 44 kDa  | 0 | 0%  | 0 | 0 | 0%  | 0 | 3 | 7%  | 2 |
| Ras-related protein Rab-11B                                               | IPI00020436 | 24 kDa  | 0 | 0%  | 0 | 0 | 0%  | 0 | 4 | 11% | 2 |
| Eukaryotic translation initiation factor 3 subunit I                      | IPI00012795 | 37 kDa  | 3 | 7%  | 2 | 0 | 0%  | 0 | 0 | 0%  | 0 |

|                                                               |             |         |   |    |   |   |     |   |   |    |   |
|---------------------------------------------------------------|-------------|---------|---|----|---|---|-----|---|---|----|---|
| Putative uncharacterized protein                              | IPI00218200 | 35 kDa  | 2 | 7% | 2 | 0 | 0%  | 0 | 0 | 0% | 0 |
| Isoform 1 of Zinc finger and BTB domain-containing protein 10 | IPI00383132 | 92 kDa  | 0 | 0% | 0 | 3 | 4%  | 2 | 0 | 0% | 0 |
| Isoform 1 of 5'-3' exoribonuclease 2                          | IPI00100151 | 109 kDa | 0 | 0% | 0 | 2 | 3%  | 2 | 0 | 0% | 0 |
| 26S proteasome non-ATPase regulatory subunit 3                | IPI00011603 | 61 kDa  | 3 | 5% | 2 | 0 | 0%  | 0 | 0 | 0% | 0 |
| Protein FAM98A                                                | IPI00174442 | 55 kDa  | 0 | 0% | 0 | 3 | 5%  | 2 | 0 | 0% | 0 |
| similar to hCG2041218                                         | IPI00886929 | 26 kDa  | 0 | 0% | 0 | 4 | 9%  | 2 | 0 | 0% | 0 |
| Fatty acid synthase                                           | IPI00026781 | 273 kDa | 0 | 0% | 0 | 2 | 1%  | 2 | 0 | 0% | 0 |
| ATP-dependent RNA helicase DDX24                              | IPI00006987 | 96 kDa  | 0 | 0% | 0 | 3 | 5%  | 3 | 0 | 0% | 0 |
| Alpha-centractin                                              | IPI00029468 | 43 kDa  | 0 | 0% | 0 | 2 | 9%  | 2 | 0 | 0% | 0 |
| 116 kDa U5 small nuclear ribonucleoprotein component          | IPI00003519 | 109 kDa | 0 | 0% | 0 | 3 | 3%  | 2 | 0 | 0% | 0 |
| Isoform 1 of Probable ATP-dependent RNA helicase DDX31        | IPI00043990 | 94 kDa  | 0 | 0% | 0 | 2 | 3%  | 2 | 0 | 0% | 0 |
| Glioma tumor suppressor candidate region gene 2 protein       | IPI00024567 | 54 kDa  | 0 | 0% | 0 | 3 | 8%  | 2 | 0 | 0% | 0 |
| Probable ATP-dependent RNA helicase DDX52                     | IPI00032423 | 67 kDa  | 0 | 0% | 0 | 4 | 7%  | 3 | 0 | 0% | 0 |
| Eukaryotic translation initiation factor 3 subunit G          | IPI00290460 | 36 kDa  | 0 | 0% | 0 | 3 | 10% | 3 | 0 | 0% | 0 |
| Cleavage and polyadenylation specificity factor subunit 5     | IPI00646917 | 26 kDa  | 0 | 0% | 0 | 3 | 19% | 3 | 0 | 0% | 0 |
| Isoform 1 of Pescadillo homolog 1                             | IPI00003768 | 68 kDa  | 0 | 0% | 0 | 2 | 7%  | 2 | 0 | 0% | 0 |
| Isoform 1 of RRP12-like protein                               | IPI00101186 | 144 kDa | 0 | 0% | 0 | 2 | 2%  | 2 | 0 | 0% | 0 |
| Nucleolar complex protein 3 homolog                           | IPI00102815 | 93 kDa  | 0 | 0% | 0 | 2 | 3%  | 2 | 0 | 0% | 0 |
| FACT complex subunit SSRP1                                    | IPI00005154 | 81 kDa  | 0 | 0% | 0 | 2 | 4%  | 2 | 0 | 0% | 0 |
| ubiquitin specific protease 9, X-linked isoform 4             | IPI00003964 | 290 kDa | 0 | 0% | 0 | 2 | 1%  | 2 | 0 | 0% | 0 |
| Desmoglein-2                                                  | IPI00028931 | 122 kDa | 0 | 0% | 0 | 0 | 0%  | 0 | 3 | 2% | 2 |
| Exosome complex exonuclease RRP40                             | IPI00015956 | 30 kDa  | 0 | 0% | 0 | 2 | 10% | 2 | 0 | 0% | 0 |
| Transcriptional activator protein Pur-alpha                   | IPI00023591 | 35 kDa  | 0 | 0% | 0 | 3 | 6%  | 2 | 0 | 0% | 0 |

|                                                                                    |             |         |   |     |   |   |     |   |   |    |   |
|------------------------------------------------------------------------------------|-------------|---------|---|-----|---|---|-----|---|---|----|---|
| 60S ribosomal protein L36a-like                                                    | IPI00056494 | 12 kDa  | 0 | 0%  | 0 | 3 | 9%  | 2 | 0 | 0% | 0 |
| Importin subunit alpha-3                                                           | IPI00299033 | 58 kDa  | 0 | 0%  | 0 | 2 | 8%  | 2 | 0 | 0% | 0 |
| Isoform 1 of H/ACA ribonucleoprotein complex subunit 1                             | IPI00302176 | 22 kDa  | 0 | 0%  | 0 | 3 | 8%  | 2 | 0 | 0% | 0 |
| Cofilin-1                                                                          | IPI00012011 | 19 kDa  | 0 | 0%  | 0 | 2 | 15% | 2 | 0 | 0% | 0 |
| Protein S100-A8                                                                    | IPI00007047 | 11 kDa  | 3 | 24% | 2 | 0 | 0%  | 0 | 0 | 0% | 0 |
| Cell division cycle 5-like protein                                                 | IPI00465294 | 92 kDa  | 0 | 0%  | 0 | 2 | 4%  | 2 | 0 | 0% | 0 |
| N-acetyltransferase 10                                                             | IPI00300127 | 116 kDa | 0 | 0%  | 0 | 2 | 2%  | 2 | 0 | 0% | 0 |
| Valyl-tRNA synthetase                                                              | IPI00000873 | 140 kDa | 0 | 0%  | 0 | 0 | 0%  | 0 | 2 | 3% | 2 |
| Lon protease homolog, mitochondrial                                                | IPI00005158 | 106 kDa | 0 | 0%  | 0 | 2 | 3%  | 2 | 0 | 0% | 0 |
| transducin beta-like 3                                                             | IPI00383410 | 89 kDa  | 0 | 0%  | 0 | 2 | 3%  | 2 | 0 | 0% | 0 |
| Brix domain-containing protein 1                                                   | IPI00396329 | 36 kDa  | 0 | 0%  | 0 | 2 | 8%  | 2 | 0 | 0% | 0 |
| Isoform 3 of Ribosome-binding protein 1                                            | IPI00215743 | 152 kDa | 0 | 0%  | 0 | 2 | 2%  | 2 | 0 | 0% | 0 |
| ATP-dependent DNA helicase 2 subunit 2                                             | IPI00220834 | 83 kDa  | 0 | 0%  | 0 | 2 | 3%  | 2 | 0 | 0% | 0 |
| Polymerase delta interacting protein 46                                            | IPI00429180 | 20 kDa  | 0 | 0%  | 0 | 2 | 17% | 2 | 0 | 0% | 0 |
| Nuclear RNA export factor 1                                                        | IPI00033153 | 70 kDa  | 0 | 0%  | 0 | 2 | 5%  | 2 | 0 | 0% | 0 |
| Isoform 2 of Suppressor of SWI4 1 homolog                                          | IPI00219793 | 52 kDa  | 0 | 0%  | 0 | 3 | 5%  | 2 | 0 | 0% | 0 |
| 60S ribosomal protein L22-like 1                                                   | IPI00856049 | 15 kDa  | 3 | 20% | 2 | 0 | 0%  | 0 | 0 | 0% | 0 |
| cDNA FLJ59571, highly similar to Eukaryotic translation initiation factor 4gamma 2 | IPI00015952 | 110 kDa | 0 | 0%  | 0 | 2 | 2%  | 2 | 0 | 0% | 0 |
| Isoform 1 of Replication factor C subunit 2                                        | IPI00017412 | 39 kDa  | 0 | 0%  | 0 | 2 | 9%  | 2 | 0 | 0% | 0 |
| Exosome complex exonuclease MTR3                                                   | IPI00073602 | 28 kDa  | 2 | 11% | 2 | 0 | 0%  | 0 | 0 | 0% | 0 |
| Putative ATP-dependent RNA helicase DHX29                                          | IPI00217413 | 155 kDa | 0 | 0%  | 0 | 2 | 2%  | 2 | 0 | 0% | 0 |
| Annexin A1                                                                         | IPI00218918 | 39 kDa  | 2 | 4%  | 2 | 0 | 0%  | 0 | 0 | 0% | 0 |

|                                                     |             |        |   |    |   |   |    |   |   |    |   |
|-----------------------------------------------------|-------------|--------|---|----|---|---|----|---|---|----|---|
| Isoform 1 of Far upstream element-binding protein 3 | IPI00377261 | 62 kDa | 0 | 0% | 0 | 2 | 4% | 2 | 0 | 0% | 0 |
| UPF0027 protein C22orf28                            | IPI00550689 | 55 kDa | 0 | 0% | 0 | 2 | 5% | 2 | 0 | 0% | 0 |

---

Supplementary Table 2

| Protein        | Peptide         | Q <sub>1</sub> , Q <sub>3</sub> | Ion           |
|----------------|-----------------|---------------------------------|---------------|
| AP1B1          | GLEISGTFTR      | 540.78→781.41                   | y3            |
|                |                 | 540.78→668.33                   | y4            |
|                |                 | 540.78→581.30                   | y5            |
|                | LQSSNIFTVAK     | 604.33→966.52                   | y2            |
|                |                 | 604.33→565.33                   | y6            |
|                |                 | 604.33→317.21                   | y8            |
|                | NINLIVQK        | 471.29→714.45                   | y2            |
|                |                 | 471.29→600.40                   | y3            |
|                |                 | 471.29→275.17                   | y6            |
| AP2A1          | ALLLSTYIK       | 511.31→837.50                   | y2            |
|                |                 | 511.31→724.42                   | y3            |
|                |                 | 511.31→611.33                   | y4            |
|                | ATIQGVLR        | 429.26→343.22                   | y2            |
|                |                 | 429.26→685.43                   | y2            |
|                |                 | 429.26→572.35                   | y3            |
|                |                 | 429.26→444.29                   | y4            |
|                | FINLFPETK       | 554.80→848.45                   | y2            |
|                |                 | 554.80→734.40                   | y3            |
|                |                 | 554.80→474.25                   | y5            |
|                | NADVELQQR       | 536.77→887.45                   | y2            |
|                |                 | 536.77→673.36                   | y4            |
| 536.77→544.31  |                 | y5                              |               |
| AP2A2          | ALLLSTYIK       | 511.31→837.50                   | y2            |
|                |                 | 511.31→724.42                   | y3            |
|                |                 | 511.31→611.33                   | y4            |
|                | GLAVFISDIR      | 545.81→849.48                   | y3            |
|                |                 | 545.81→750.41                   | y4            |
|                |                 | 545.81→288.20                   | y8            |
|                | NADVELQQR       | 536.77→887.45                   | y2            |
|                |                 | 536.77→673.36                   | y4            |
|                |                 | 536.77→544.31                   | y5            |
| AP2B1          | GLEISGTFTHR     | 609.31→805.39                   | y4            |
|                |                 | 609.31→718.36                   | y5            |
|                |                 | 609.31→413.22                   | y8            |
|                | LLSTDPVTAK      | 522.80→818.42                   | y2            |
|                |                 | 522.80→731.39                   | y3            |
|                |                 | 522.80→515.31                   | y5            |
|                |                 | 522.80→319.19                   | y7            |
|                | LQNNNVYTIAK     | 639.34→1036.54                  | y2            |
|                |                 | 639.34→595.34                   | y6            |
| 639.34→432.28  |                 | y7                              |               |
| 639.34→331.23  |                 | y8                              |               |
| AP2M1          | SNIWLAAVTK      | 551.81→788.46                   | y3            |
|                |                 | 551.81→602.38                   | y4            |
|                |                 | 551.81→489.30                   | y5            |
|                | SPVTNIAR        | 429.24→385.72                   | y1            |
|                |                 | 429.24→673.39                   | y2            |
|                |                 | 429.24→574.33                   | y3            |
| TFITQQGIK      | 518.29→787.46   | y2                              |               |
|                | 518.29→674.38   | y3                              |               |
|                | 518.29→573.33   | y4                              |               |
| AP2S1          | FILIQNR         | 452.27→643.38                   | y2            |
|                |                 | 452.27→322.19                   | y2            |
|                |                 | 452.27→530.30                   | y3            |
| HTNFVEFR       | 525.26→811.40   | y2                              |               |
|                | 525.26→697.36   | y3                              |               |
| BMP2K          | ITDTIGPTETSIAPR | 786.41→343.20                   | y12           |
|                |                 | 786.41→1028.53                  | y5            |
|                |                 | 786.41→971.51                   | y6            |
|                | VLQQLQQGDWR     | 685.86→902.44                   | y4            |
|                |                 | 685.86→789.36                   | y5            |
|                |                 | 685.86→533.24                   | y7            |
| 685.86→361.19  | y9              |                                 |               |
|                | EPS15           | IWDLADTDGK                      | 567.27→834.38 |
| 567.27→719.35  |                 |                                 | y3            |
| 567.27→420.20  |                 |                                 | y6            |
| SATSSSVSNVVITK | 690.37→460.31   | y10                             |               |
|                | 690.37→760.45   | y7                              |               |

|         |                  |                                                                                   |                            |
|---------|------------------|-----------------------------------------------------------------------------------|----------------------------|
|         |                  | 690.37→673.42                                                                     | y8                         |
|         | VLASDAAFLK       | 553.31→893.47<br>553.31→735.40<br>553.31→407.26                                   | y2<br>y4<br>y8             |
| EPS15L1 | QVDPAYTGR        | 503.75→779.36<br>503.75→664.34<br>503.75→496.25                                   | y2<br>y3<br>y5             |
|         | SGLSDIILGK       | 501.79→429.76<br>501.79→745.44<br>501.79→317.21                                   | y2<br>y3<br>y7             |
|         | STQDEINQAR       | 581.27→845.41<br>581.27→730.38<br>581.27→488.25                                   | y3<br>y4<br>y6             |
|         | VGASEAALFLK      | 553.31→791.46<br>553.31→662.42<br>553.31→407.26                                   | y4<br>y5<br>y8             |
| hNb     | AVLWVSADGLR      | 593.83→717.38<br>593.83→618.32<br>593.83→345.22                                   | y4<br>y5<br>y8             |
|         | GFPALSQK         | 424.23→643.37<br>424.23→546.32<br>424.23→475.28<br>424.23→362.20<br>424.23→181.60 | y2<br>y3<br>y4<br>y5<br>y5 |
|         | YLGHVEVDESR      | 652.31→970.45<br>652.31→734.33<br>652.31→391.19<br>652.31→262.15                  | y3<br>y5<br>y8<br>y9       |
| hNbL    | HAPLEQLVR        | 531.80→854.50<br>531.80→644.37<br>531.80→515.32                                   | y2<br>y4<br>y5             |
|         | WLEEVSVQAK       | 594.81→889.46<br>594.81→760.41<br>594.81→532.30                                   | y2<br>y3<br>y5             |
|         | YLGHVEVEESR      | 659.32→847.41<br>659.32→748.34<br>659.32→619.30                                   | y4<br>y5<br>y6             |
| mNb     | YLGHVEVDESR      | 652.32→262.15<br>652.32→391.19<br>652.32→734.33                                   | y2<br>y3<br>y6             |
|         | ETNPWAHVPAANK    | 775.37→403.22<br>775.37→615.30<br>775.37→851.43                                   | y4<br>y6<br>y8             |
|         | GFPALSQK         | 424.23→362.20<br>424.23→475.28<br>424.23→546.32<br>424.23→643.37                  | y3<br>y4<br>y5<br>y6       |
| RaBP1   | AEIAEIQSR        | 508.77→816.45<br>508.77→703.37<br>508.77→632.33<br>508.77→390.20                  | y2<br>y3<br>y4<br>y6       |
|         | AKAEQQAQEDEEPEWR | 972.44→845.37<br>972.44→587.29<br>972.44→960.40                                   | y10<br>y12<br>y9           |
|         | TMMYDGIR         | 493.72→754.35<br>493.72→623.31<br>493.72→345.22                                   | y2<br>y3<br>y5             |
|         | TTETEKVQEFQR     | 748.37→934.50<br>748.37→707.34                                                    | y5<br>y7                   |
| REPS1   | ASDPASSLR        | 452.23→745.38<br>452.23→373.19<br>452.23→630.35<br>452.23→315.68                  | y2<br>y2<br>y3<br>y3       |
|         | LVAVAQSGFPLR     | 629.36→875.47<br>629.36→804.43<br>629.36→589.34<br>629.36→385.25                  | y4<br>y5<br>y7<br>y9       |
|         | TAASAPANVSK      | 508.77→844.45<br>508.77→773.41<br>508.77→686.38<br>508.77→615.34                  | y2<br>y3<br>y4<br>y5       |



TGVLA AVLASQPSIPR

790.46→697.39  
790.46→569.34  
790.46→855.46  
790.46→784.43

y10  
y11  
y8  
y9

A

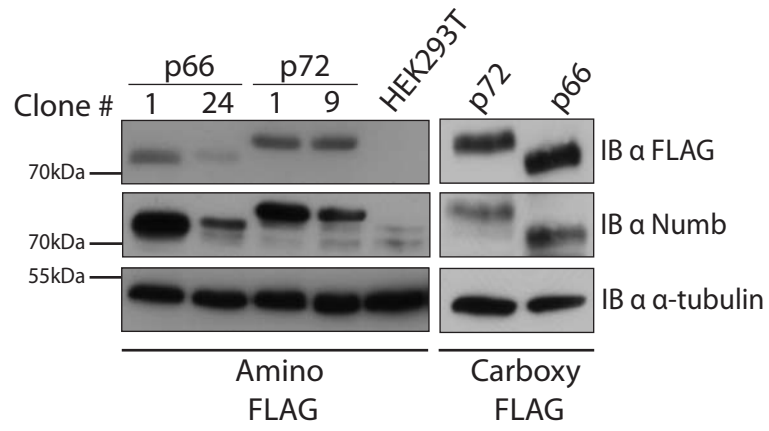

B

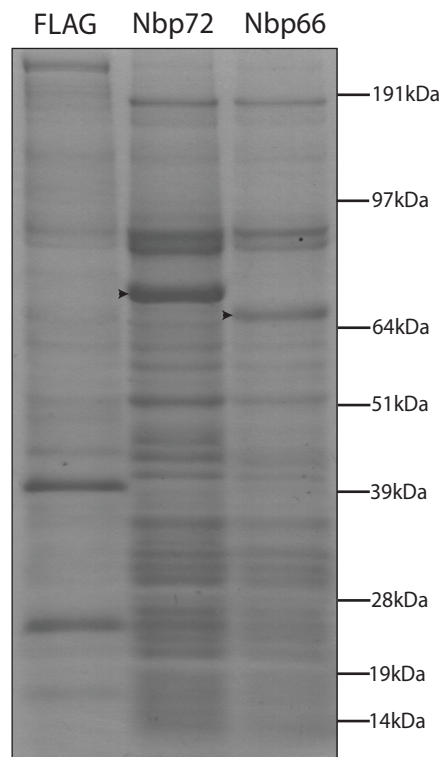

A

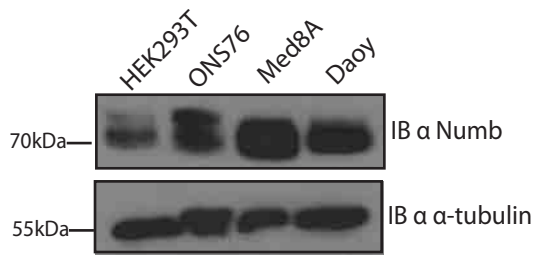

B

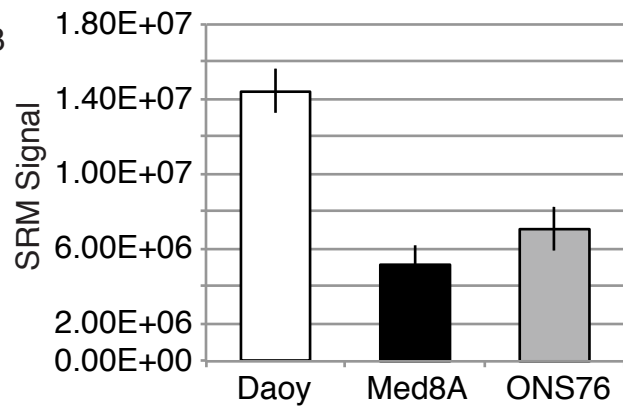

C

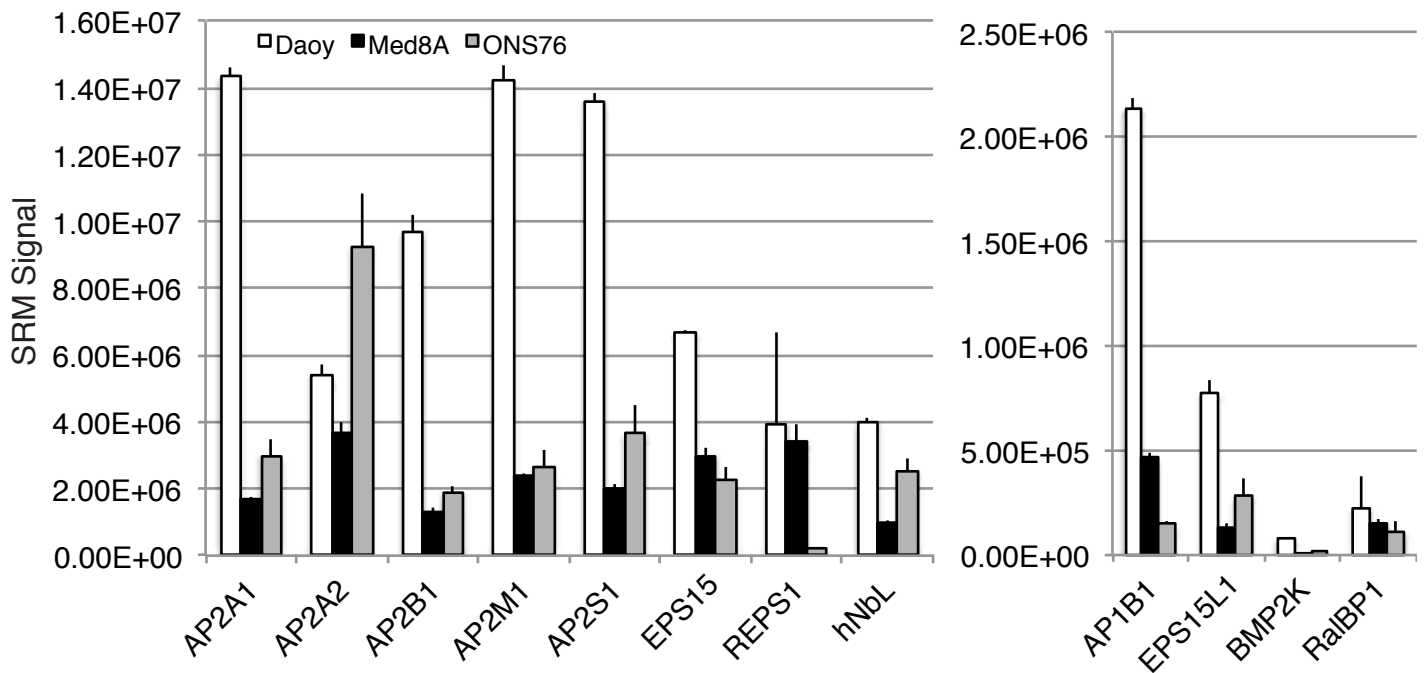

Supplementary Figure 2

A

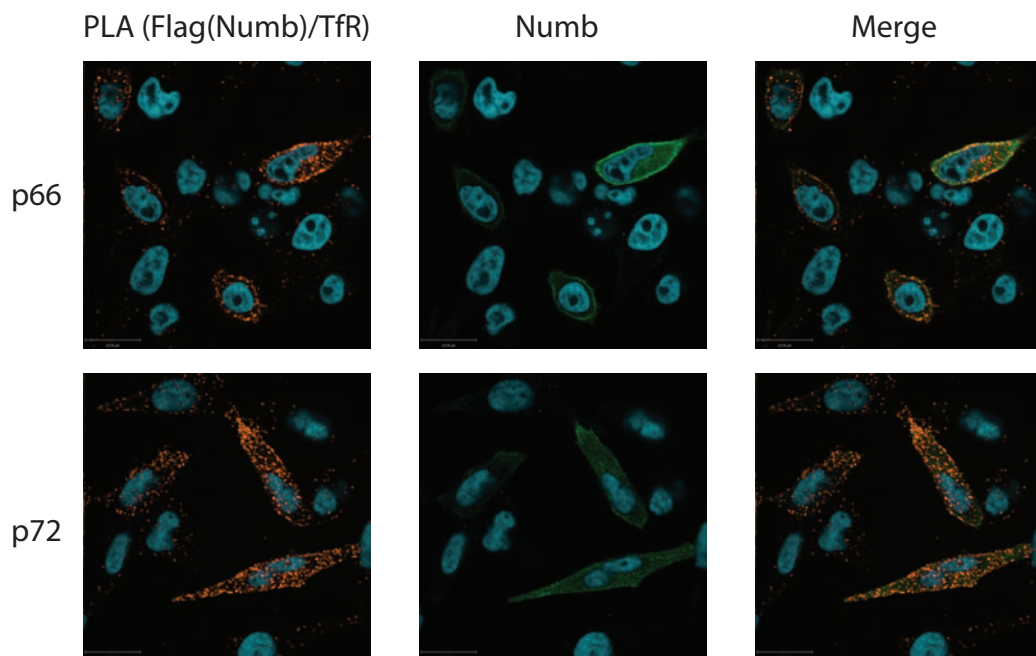

B

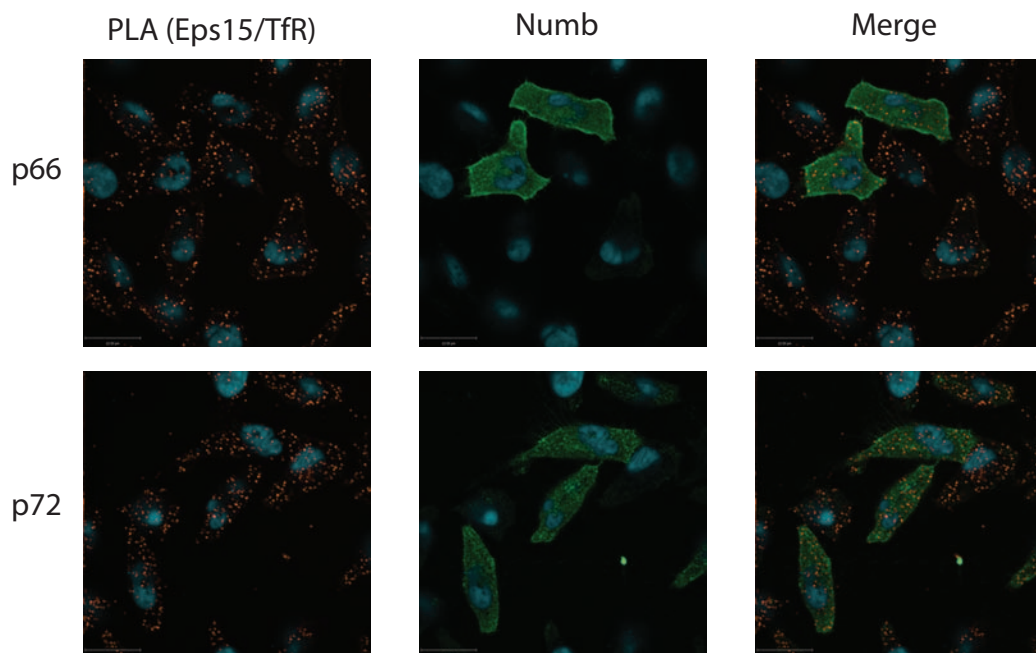

Supplement: supp_M112.020768_mcp.M112.020768-1.pdf [file supp_M112.020768_mcp.M112.020768-1.pdf]
